# Supplementary material for: Feasibility of eliminating visceral leishmaniasis from the Indian subcontinent: explorations with a set of deterministic age-structured transmission models
Source: PubMed Central journal article supplement (PMC4717541; doi:10.1186/s13071-016-1292-0), 2016-01-19

# Incidence of VL (first-line treatments)

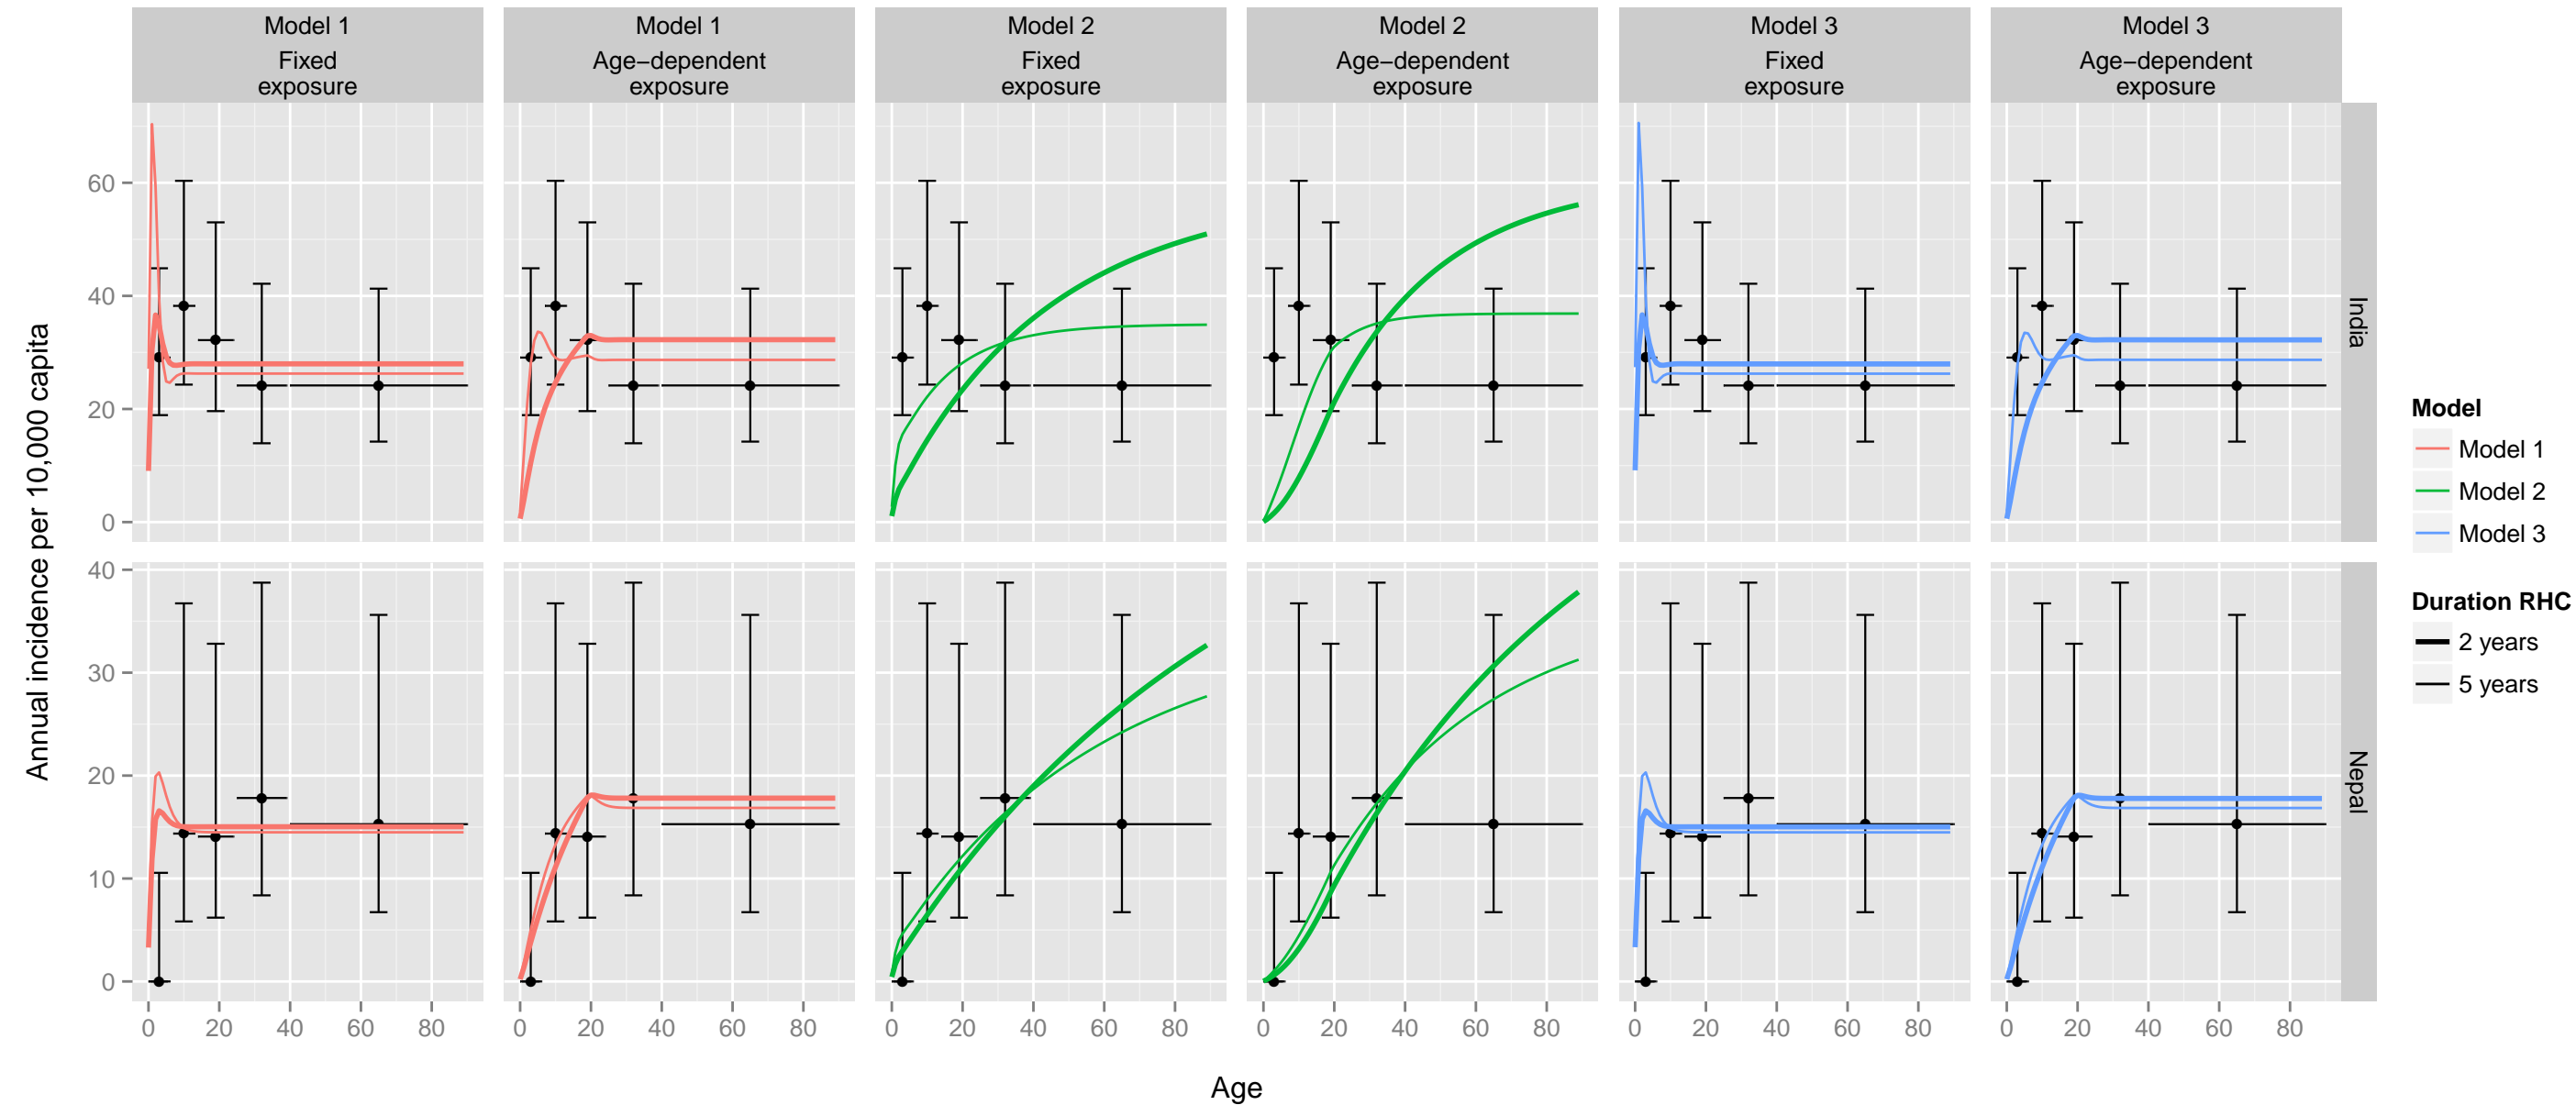

# Incidence of PCR+ (change from PCR- to PCR+)

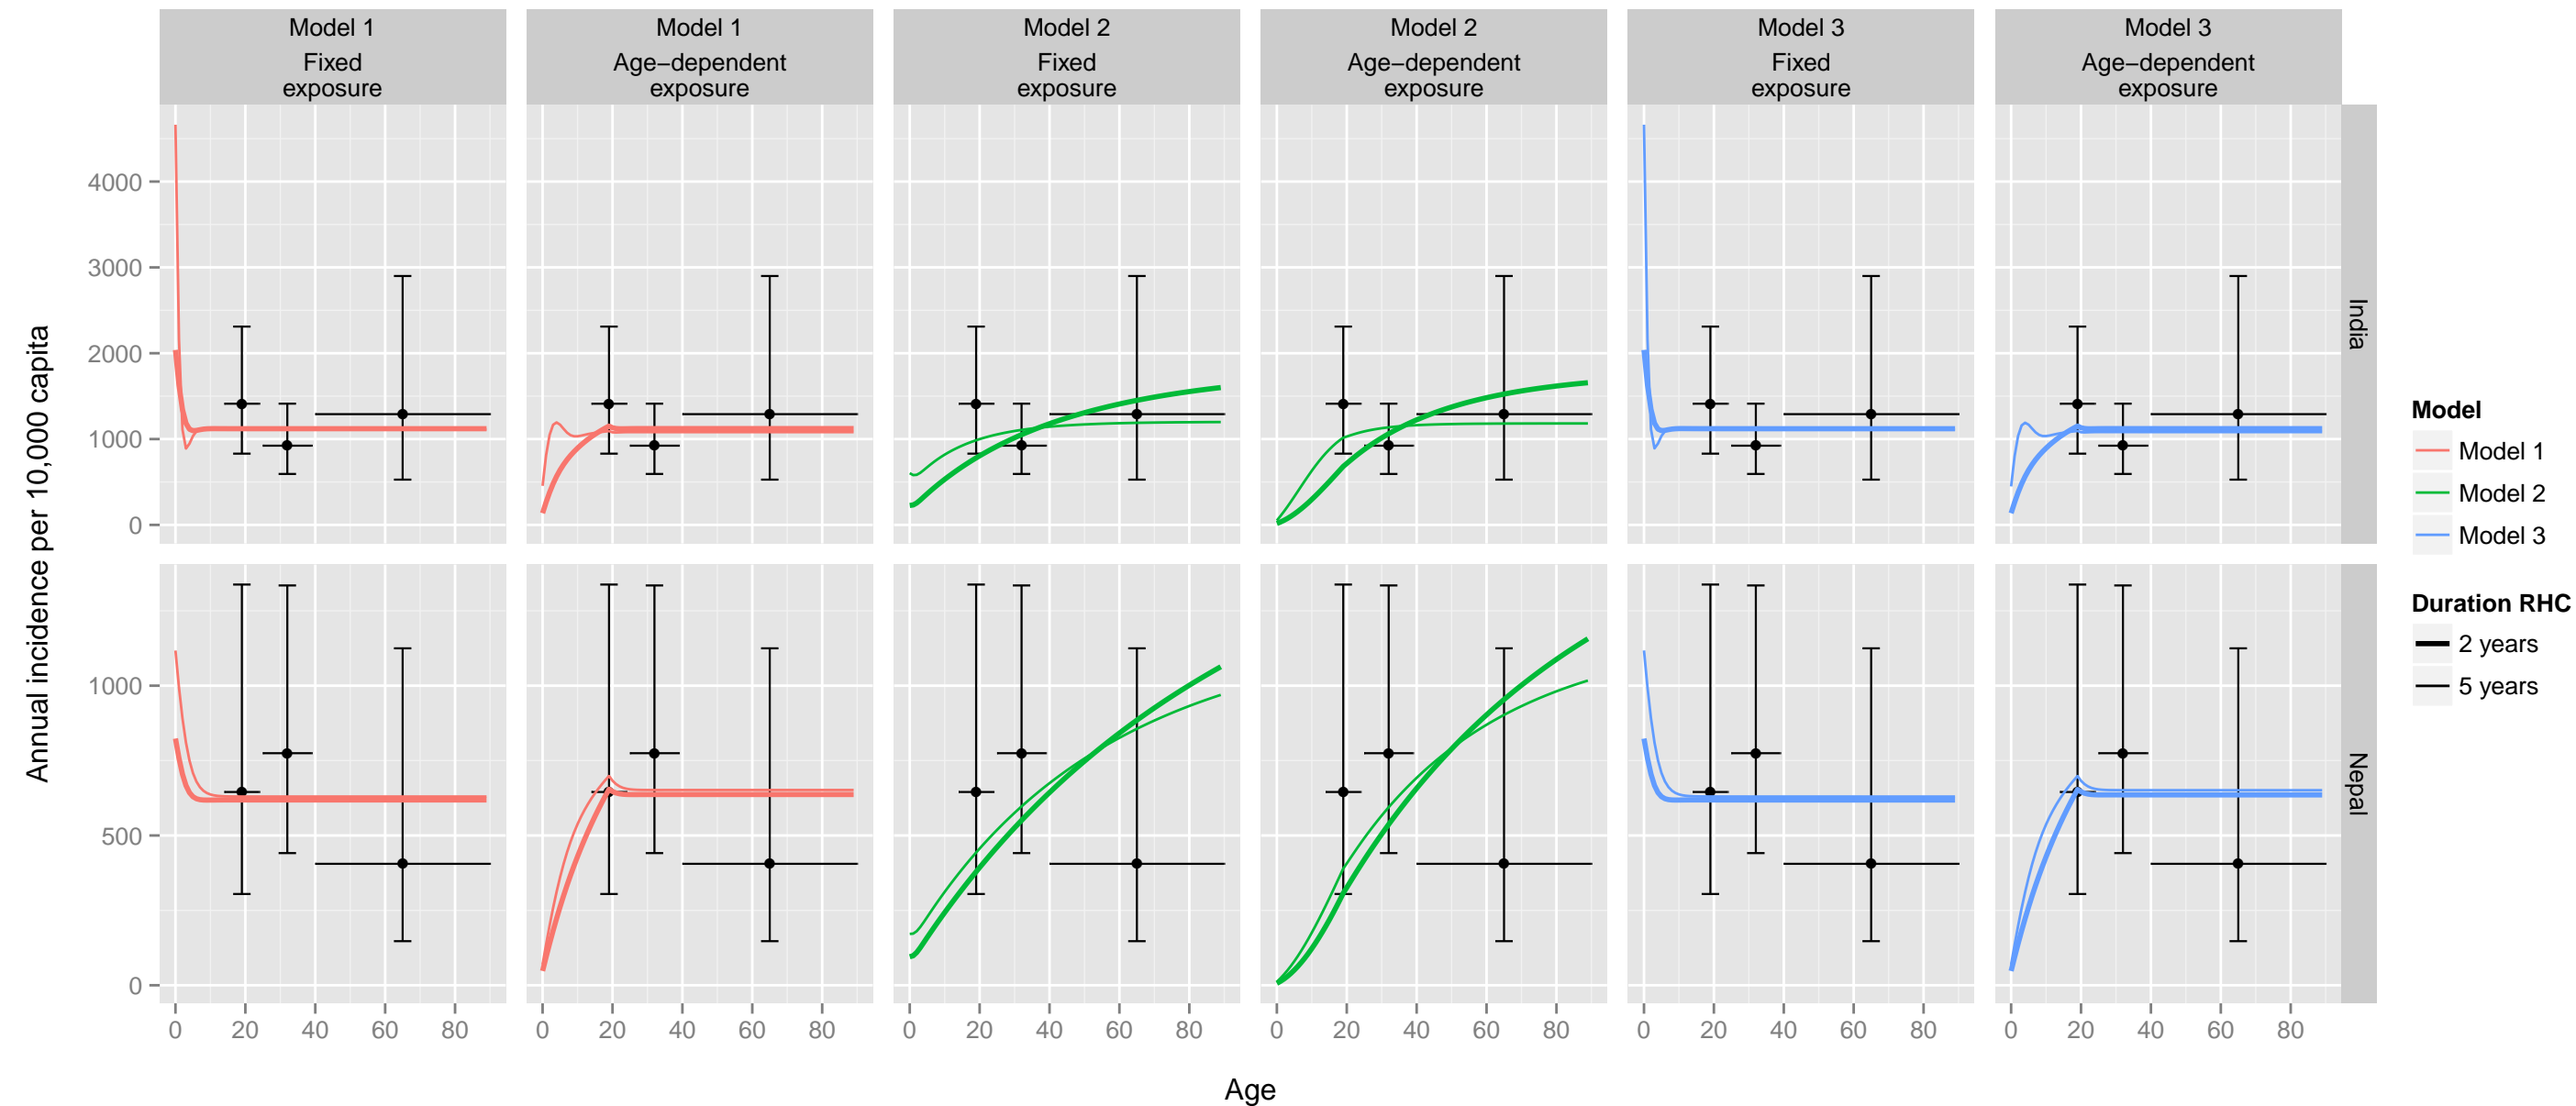

# Prevalence of PCR+

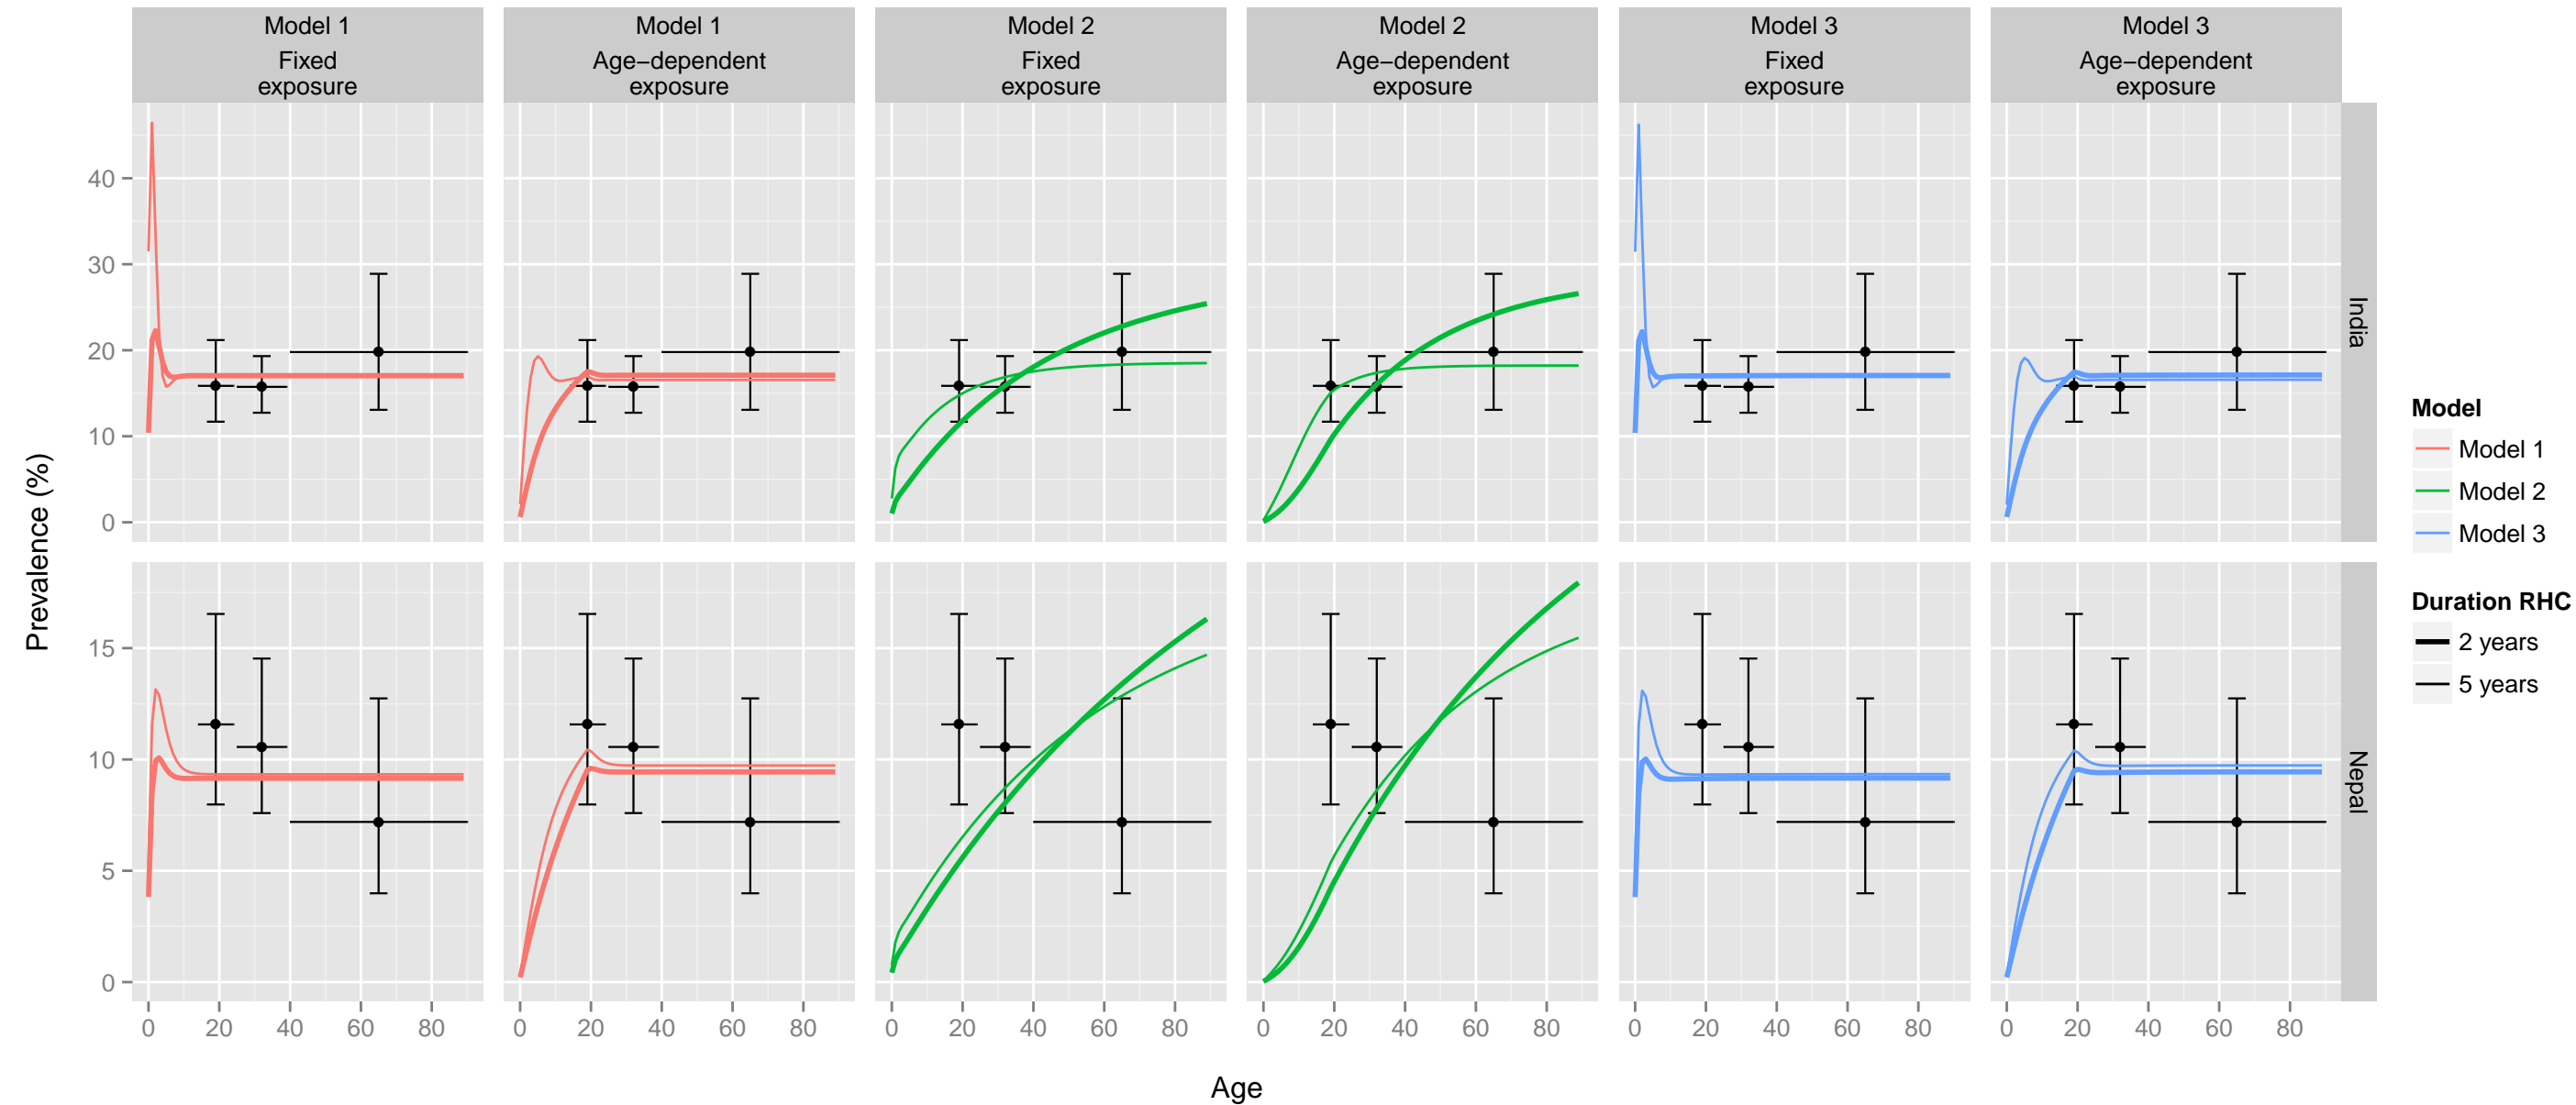

# Prevalence of DAT+

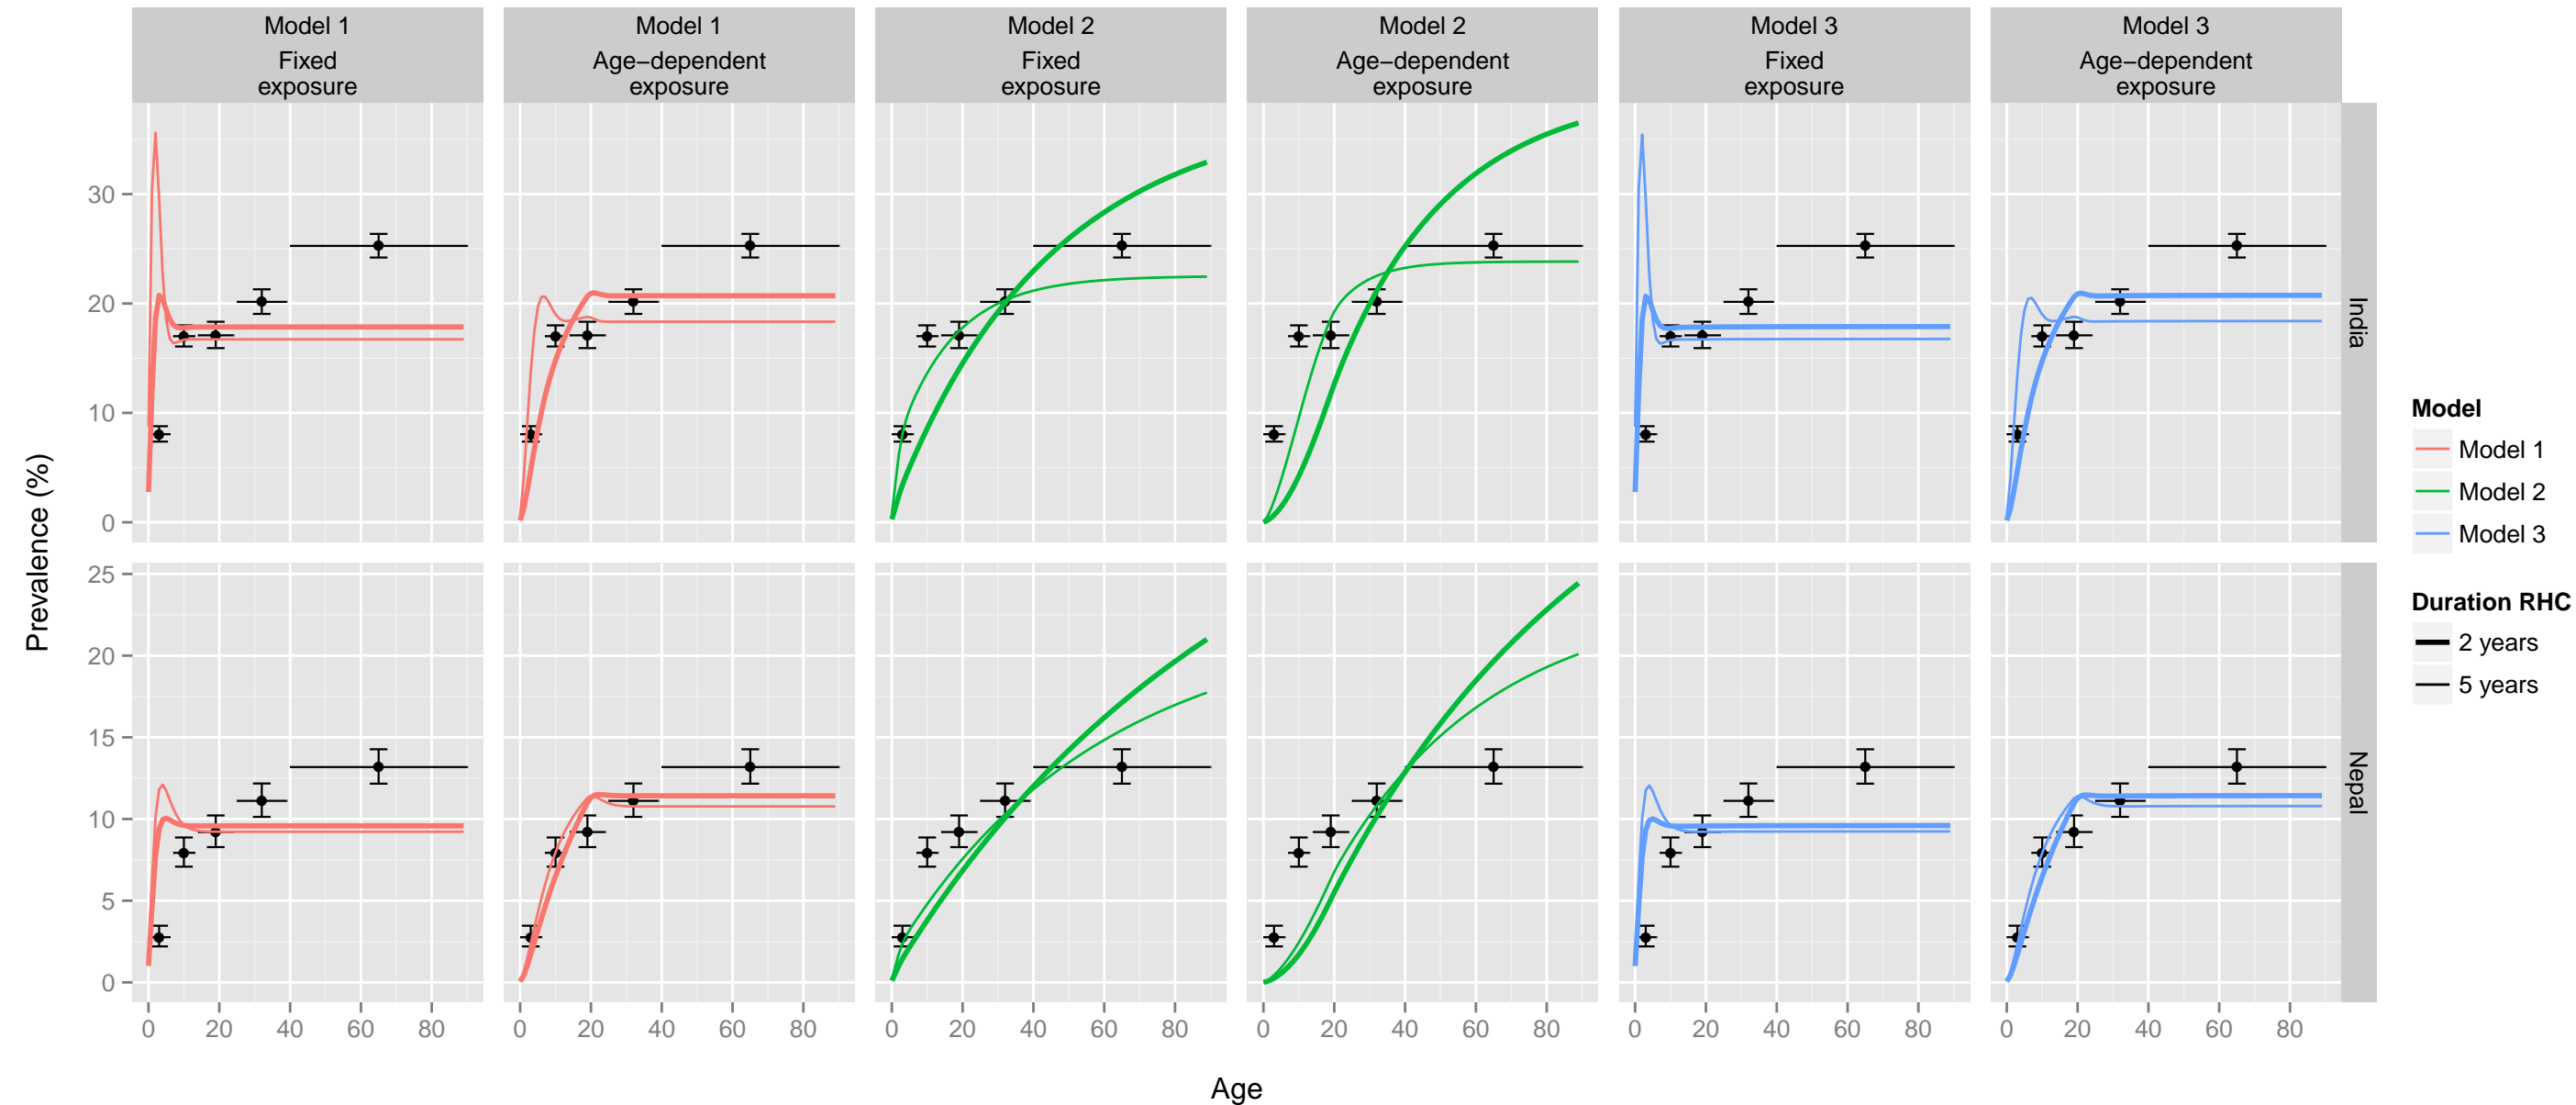

# Prevalence of PCR+/DAT+

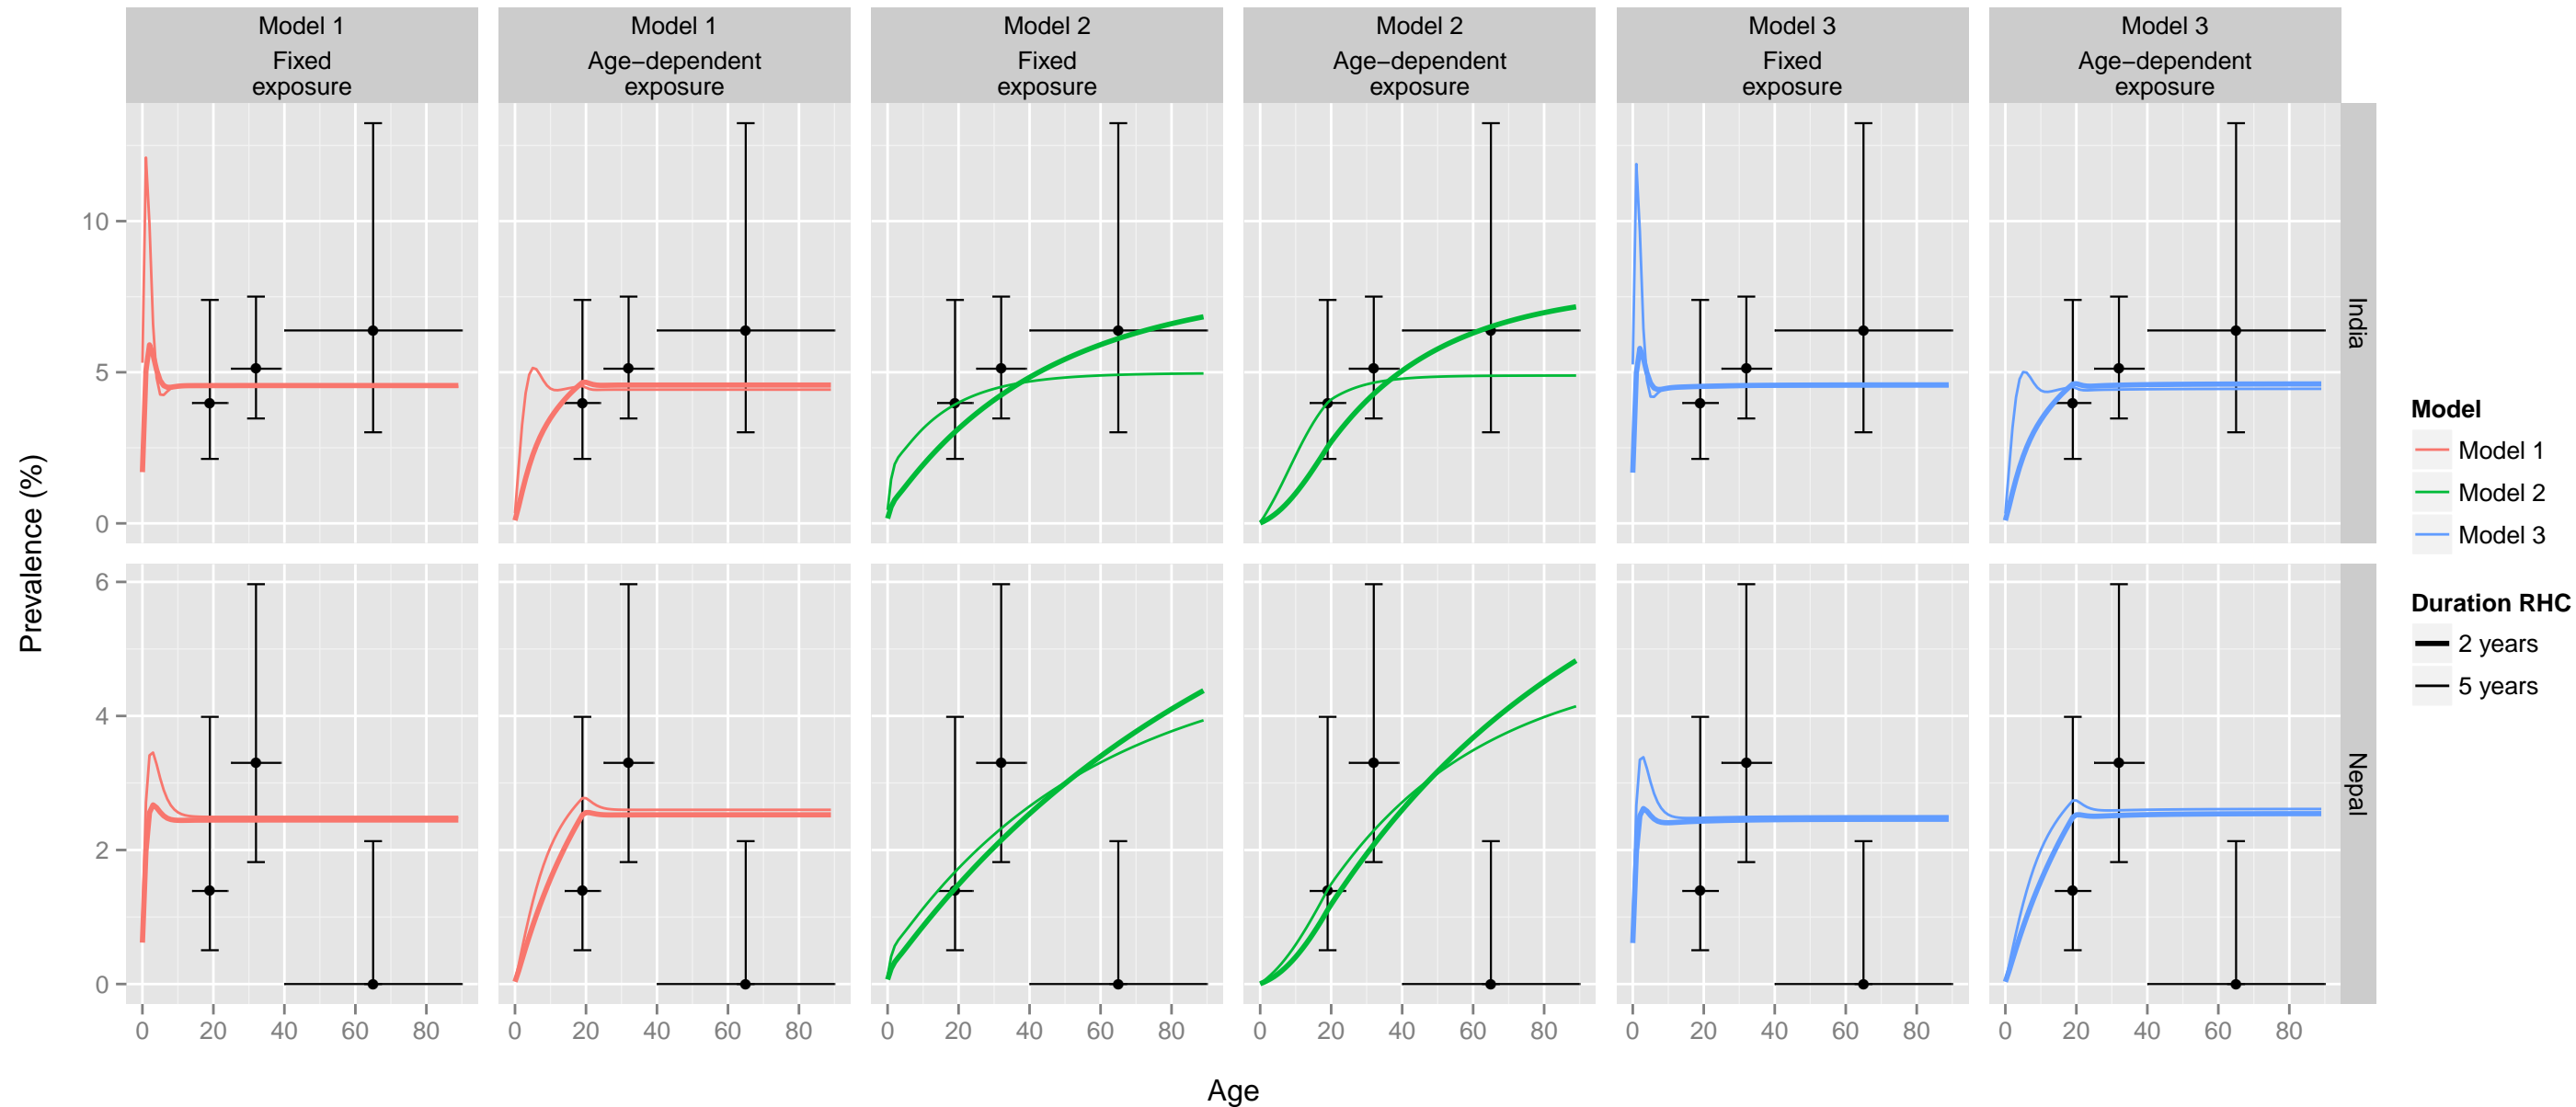

Supplement: 13071_2016_1292_MOESM2_ESM.pdf [file 13071_2016_1292_MOESM2_ESM.pdf]
