# Supplementary material for: Feasibility of eliminating visceral leishmaniasis from the Indian subcontinent: explorations with a set of deterministic age-structured transmission models
Source: PubMed Central journal article supplement (PMC4717541; doi:10.1186/s13071-016-1292-0), 2016-01-19

— Optimal IRS    - - - Sub-optimal IRS

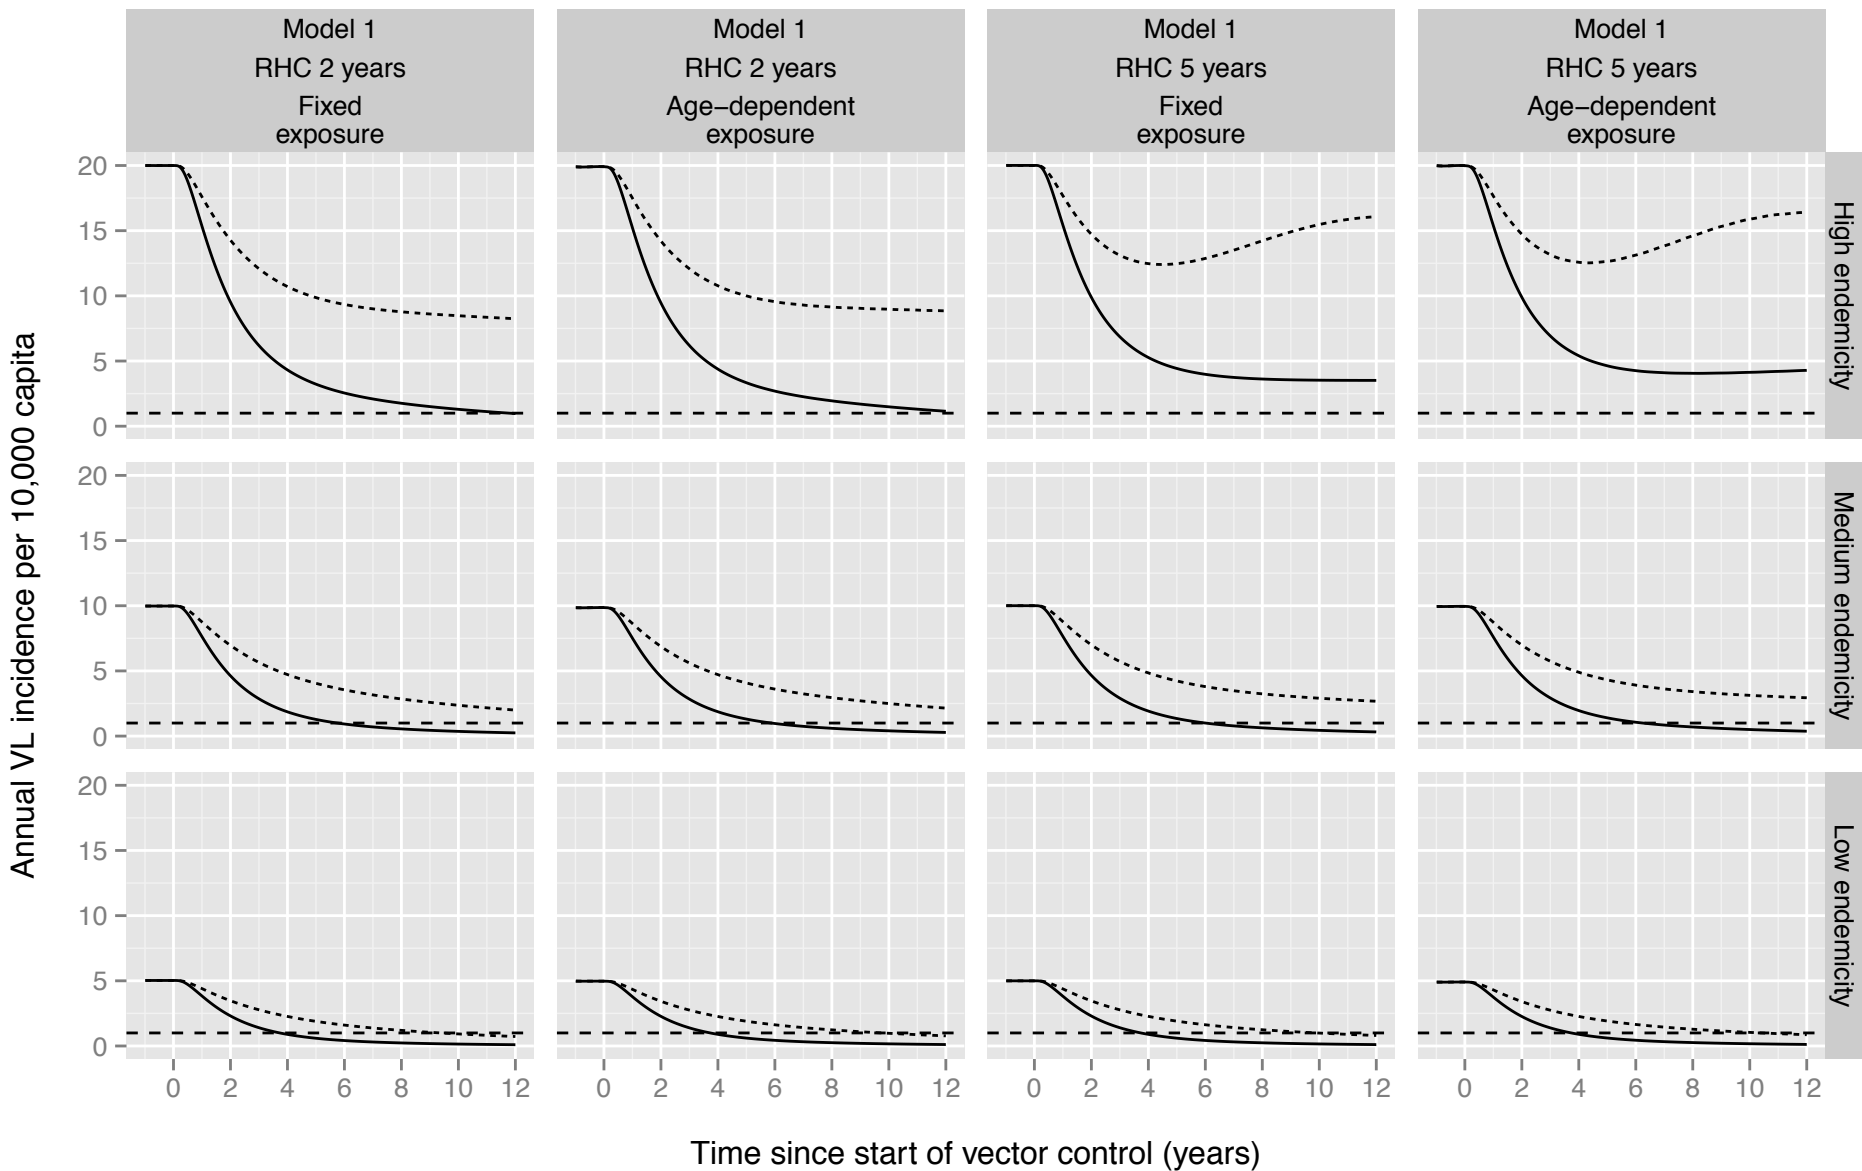

— Optimal IRS    - - - Sub-optimal IRS

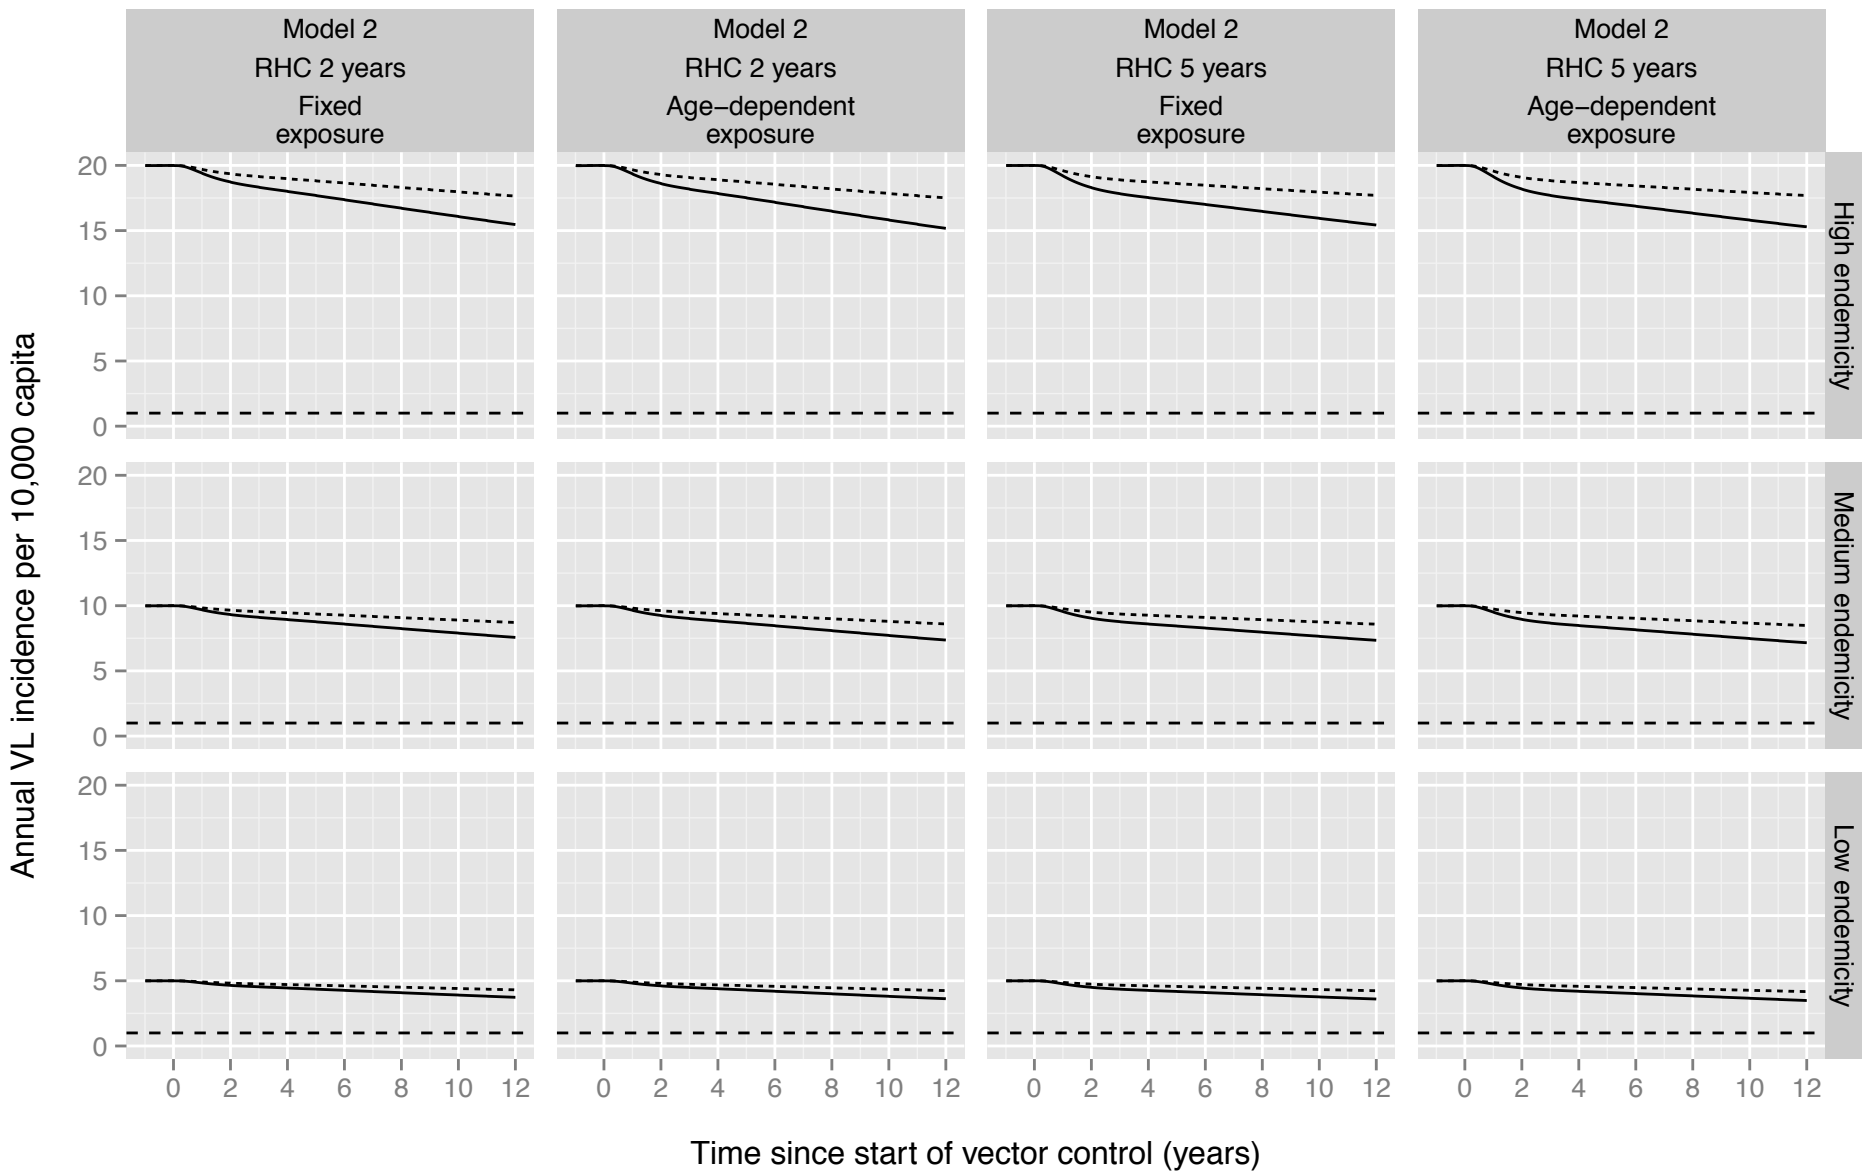

— Optimal IRS    - - - Sub-optimal IRS

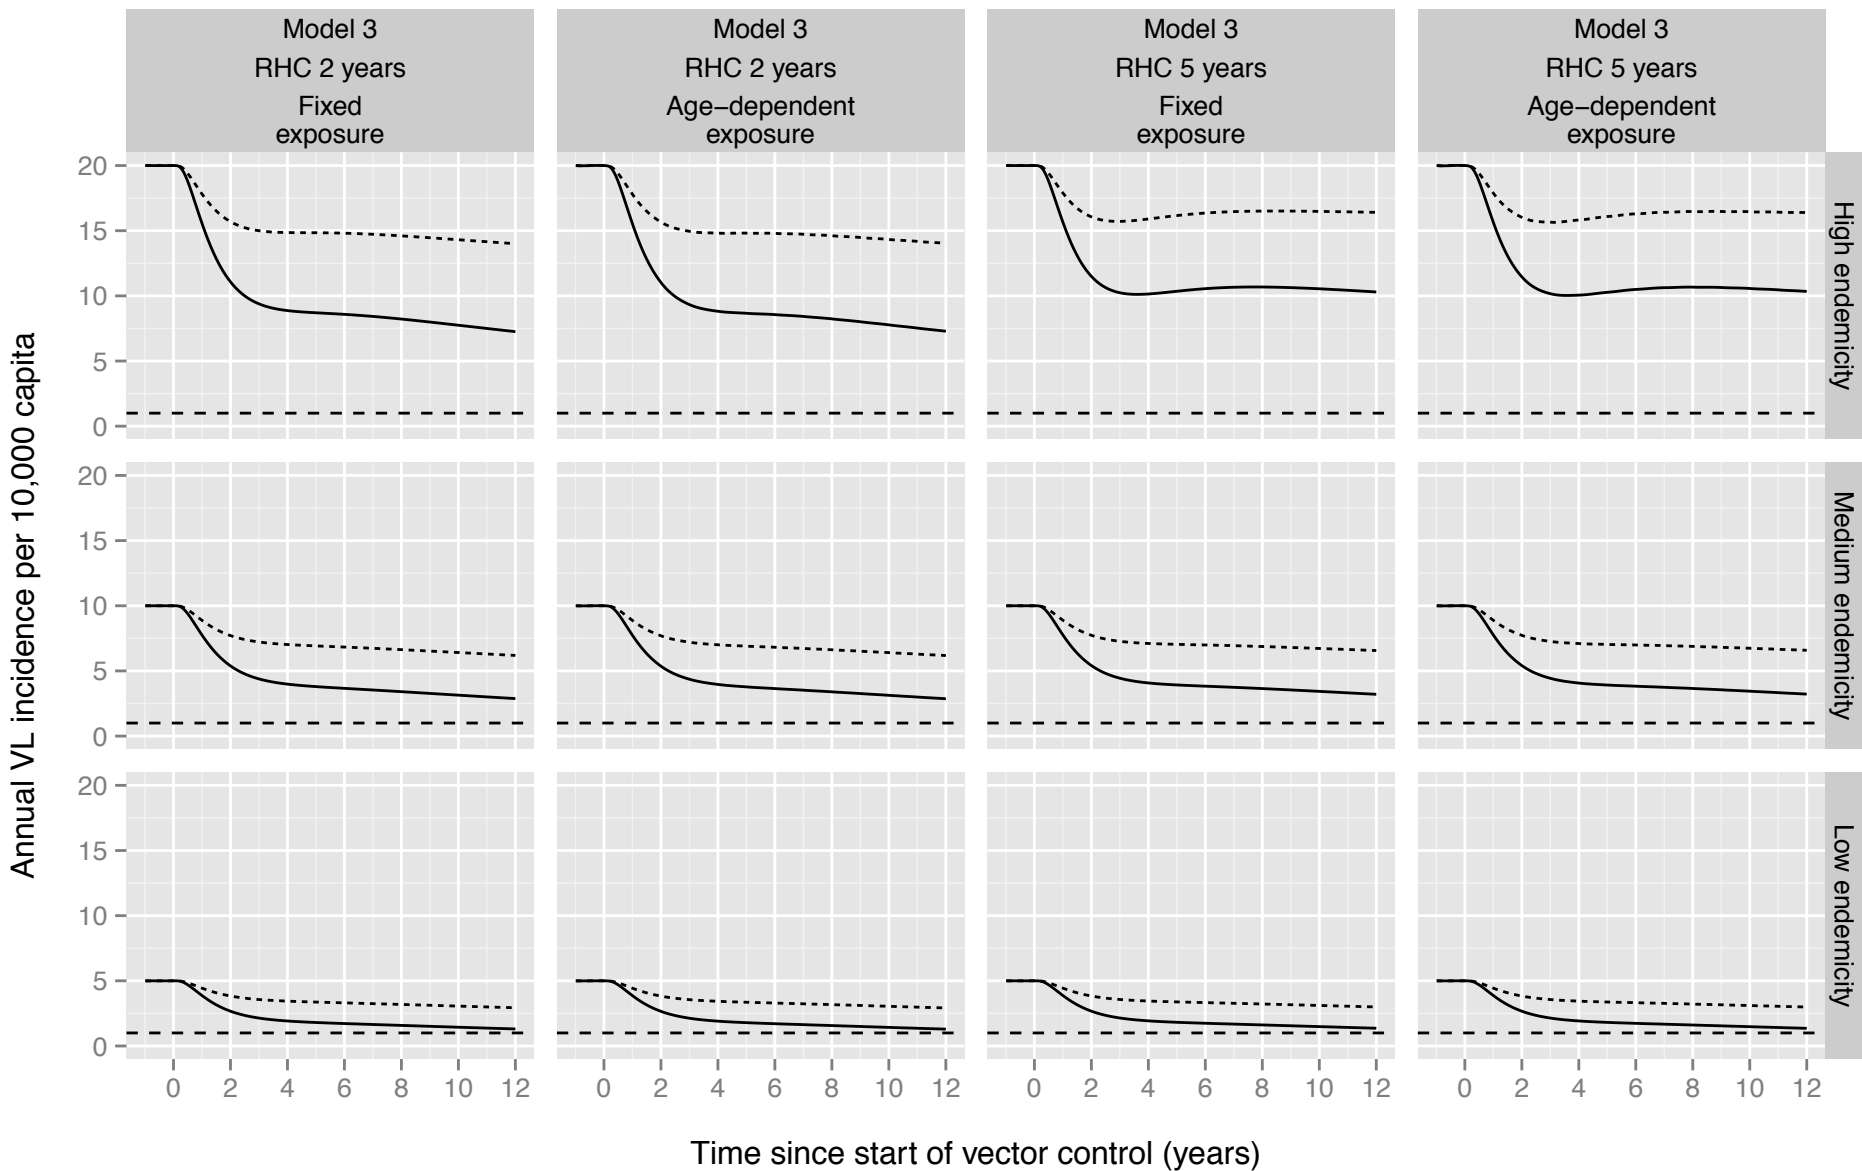

— Optimal IRS    - - - - Sub-optimal IRS

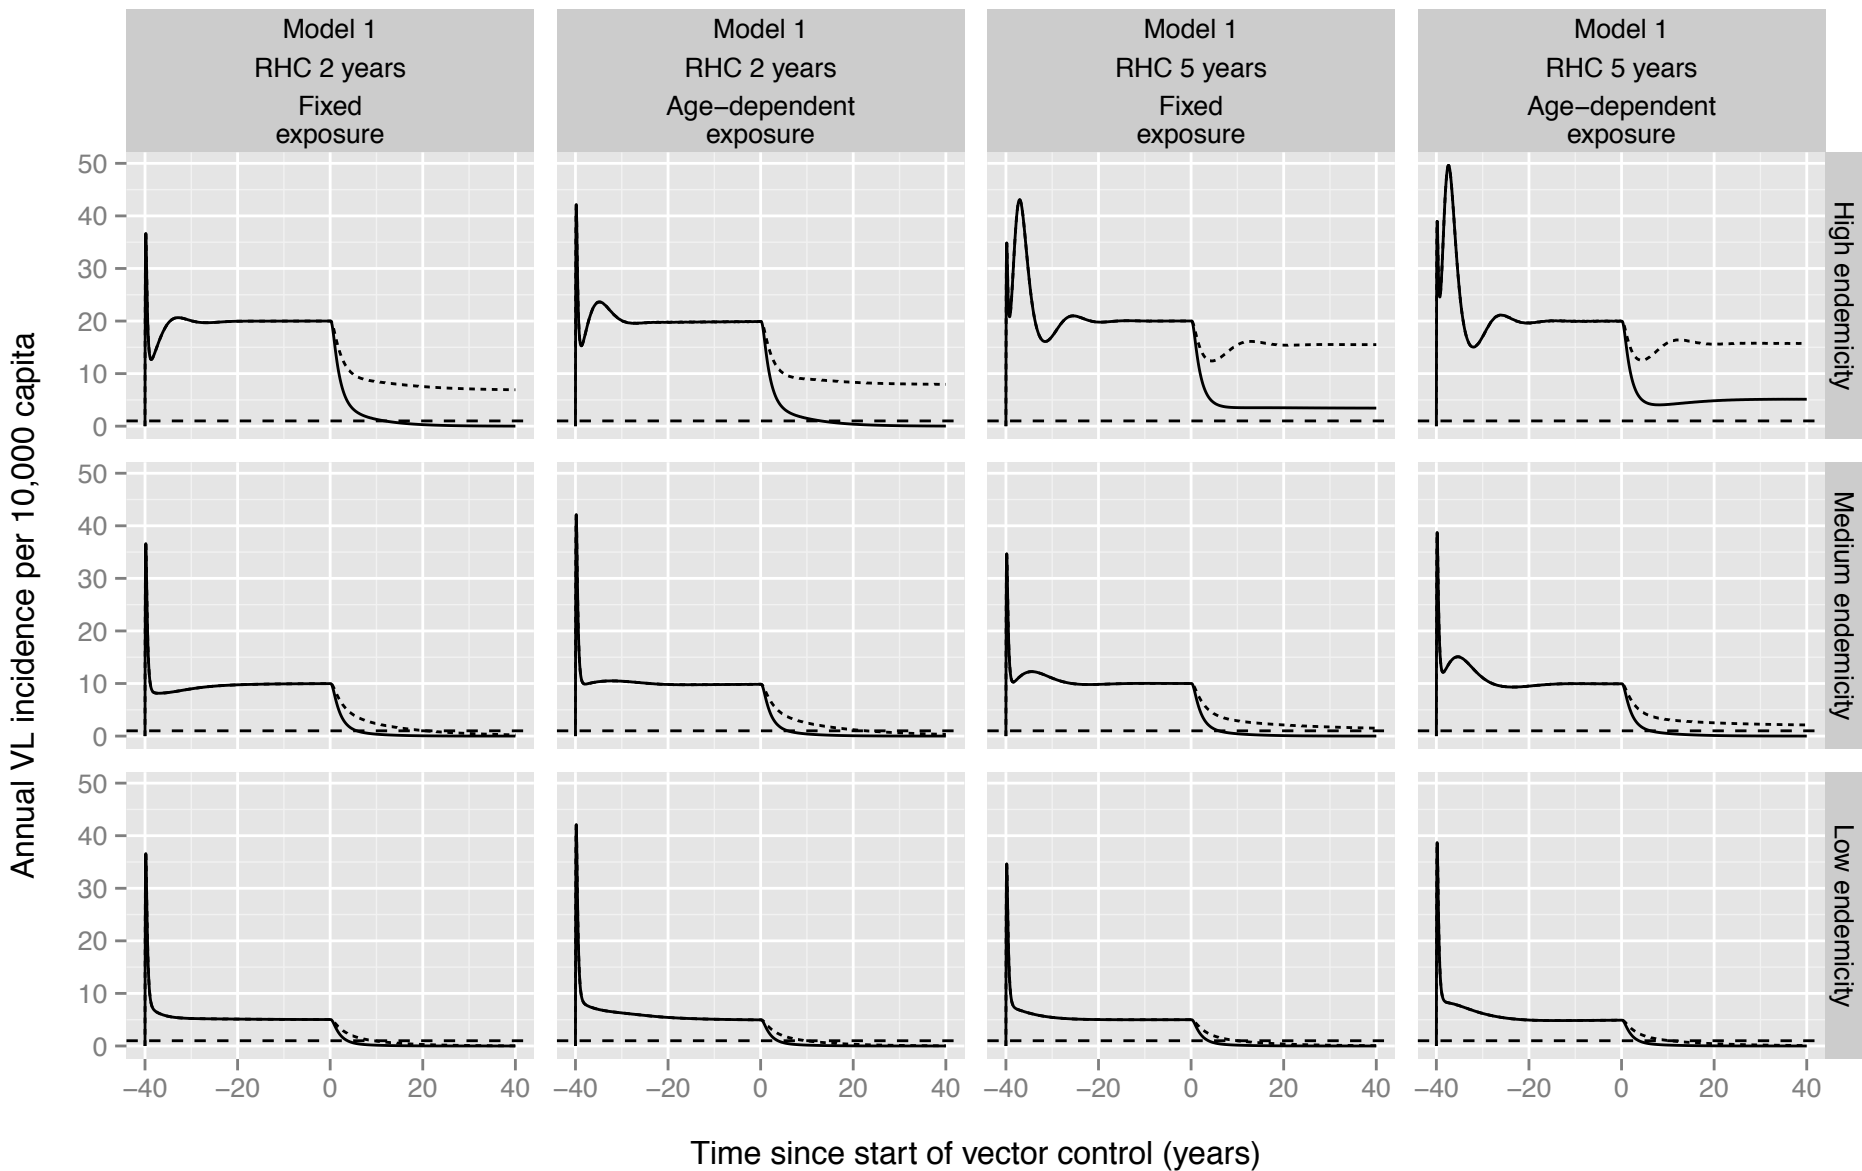

— Optimal IRS    - - - - Sub-optimal IRS

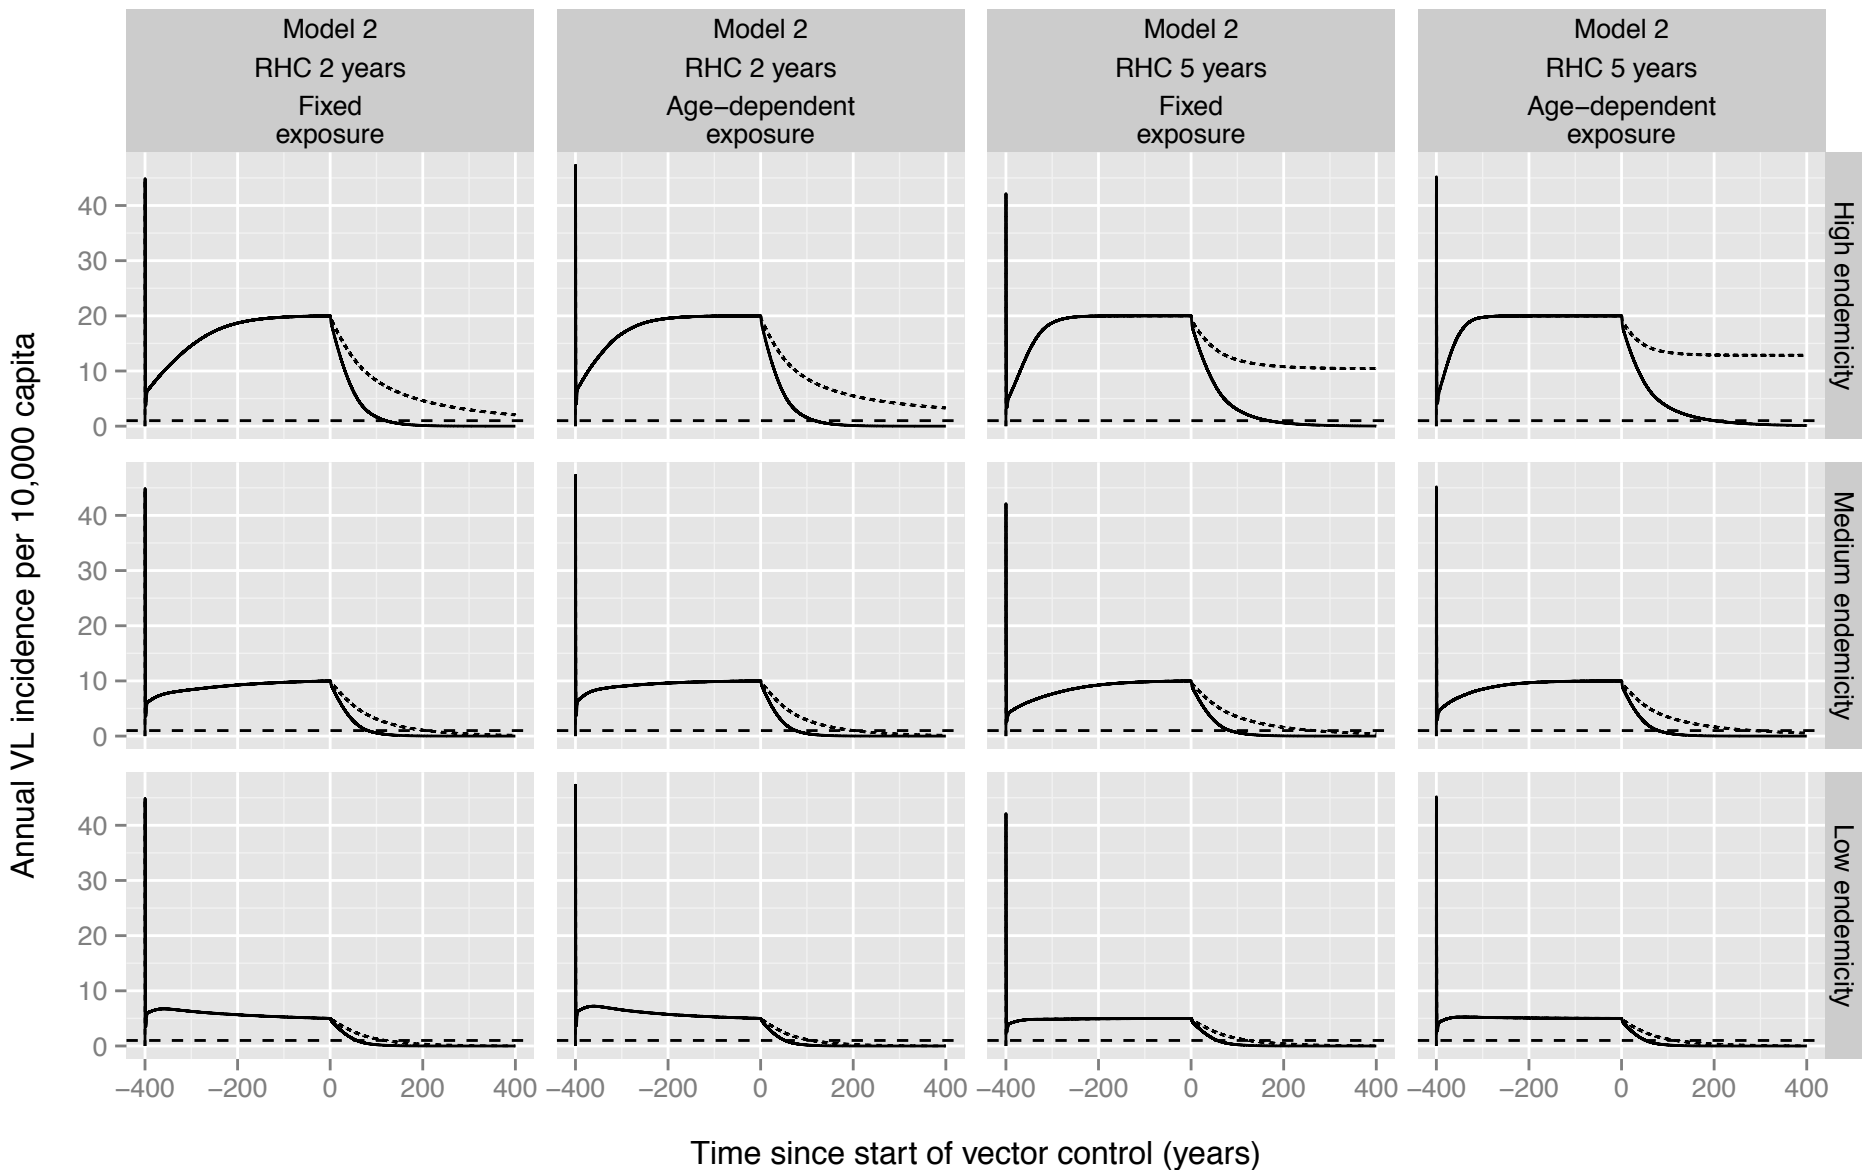

— Optimal IRS    - - - - Sub-optimal IRS

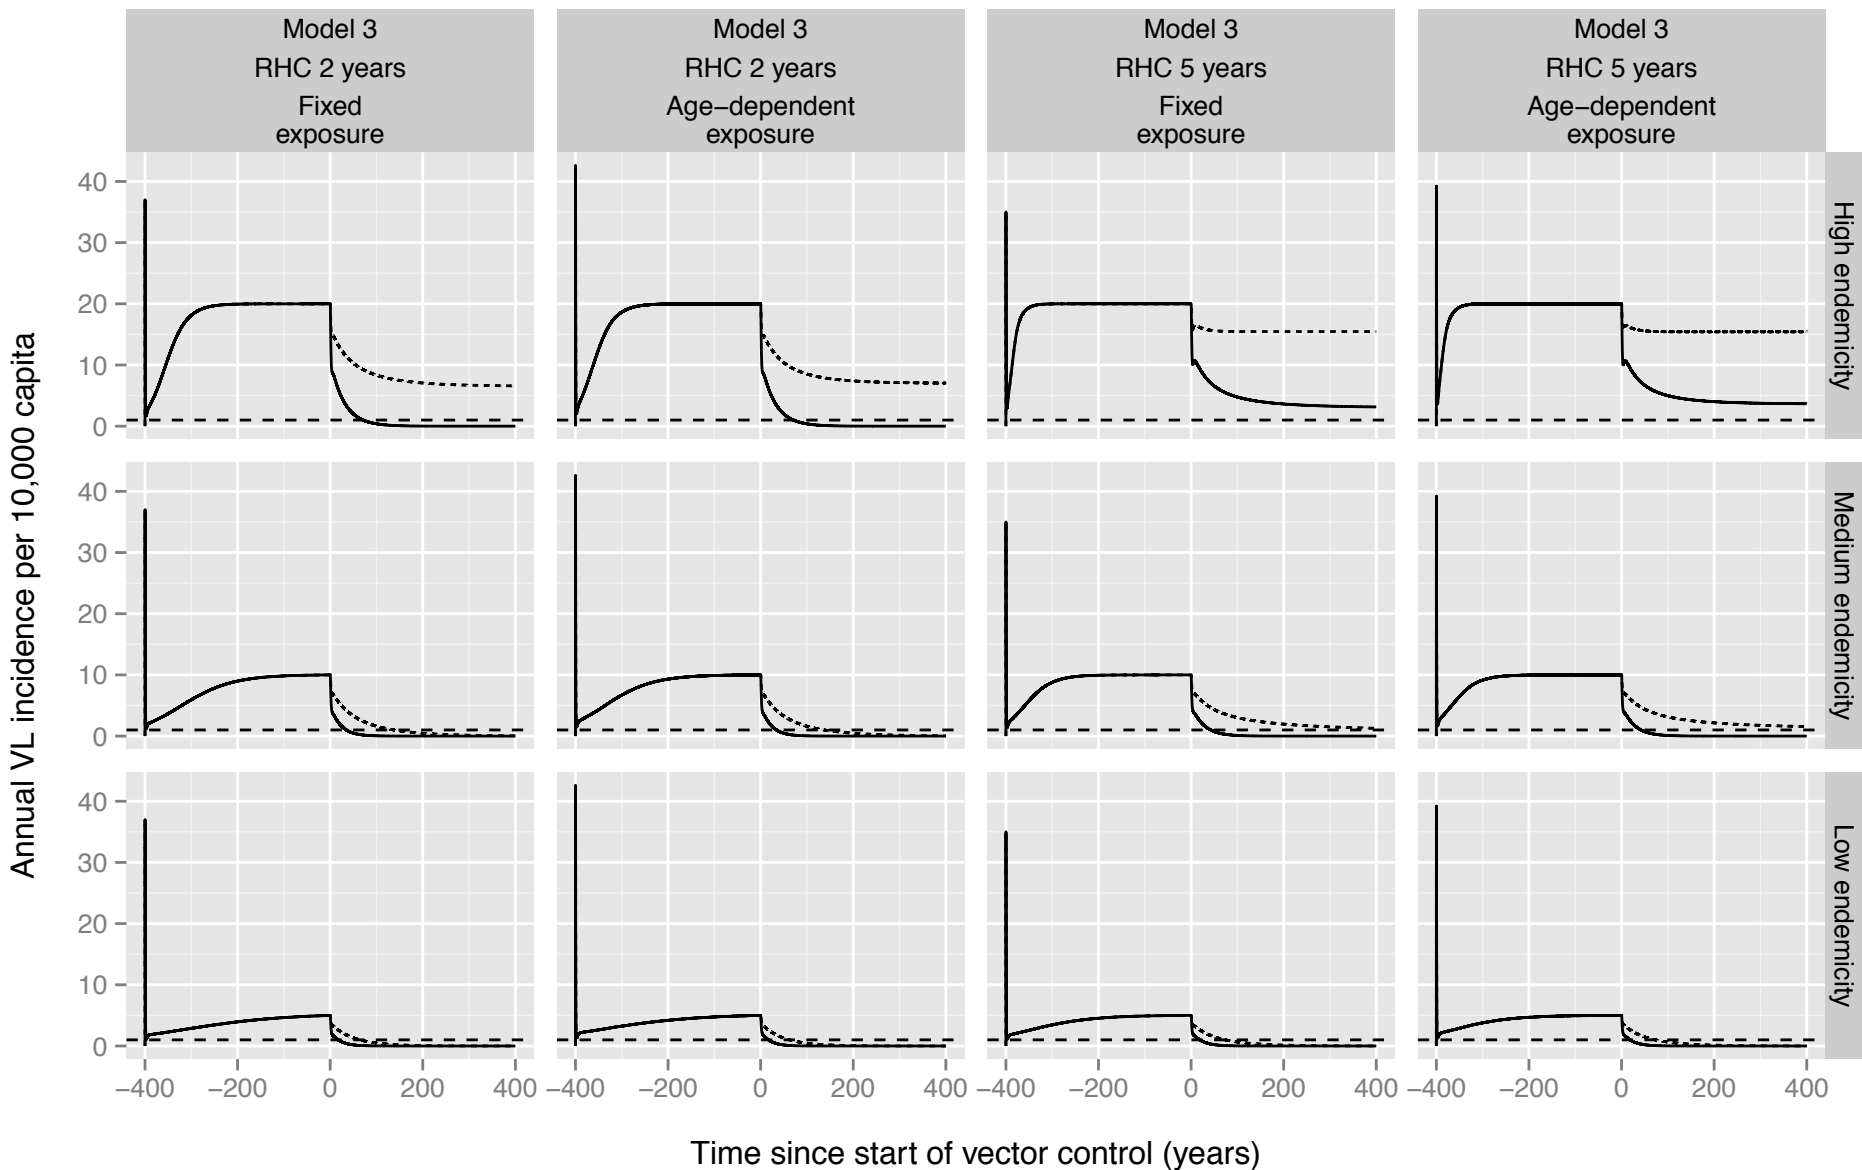

— High endemicity    - - Medium endemicity    ···· Low endemicity

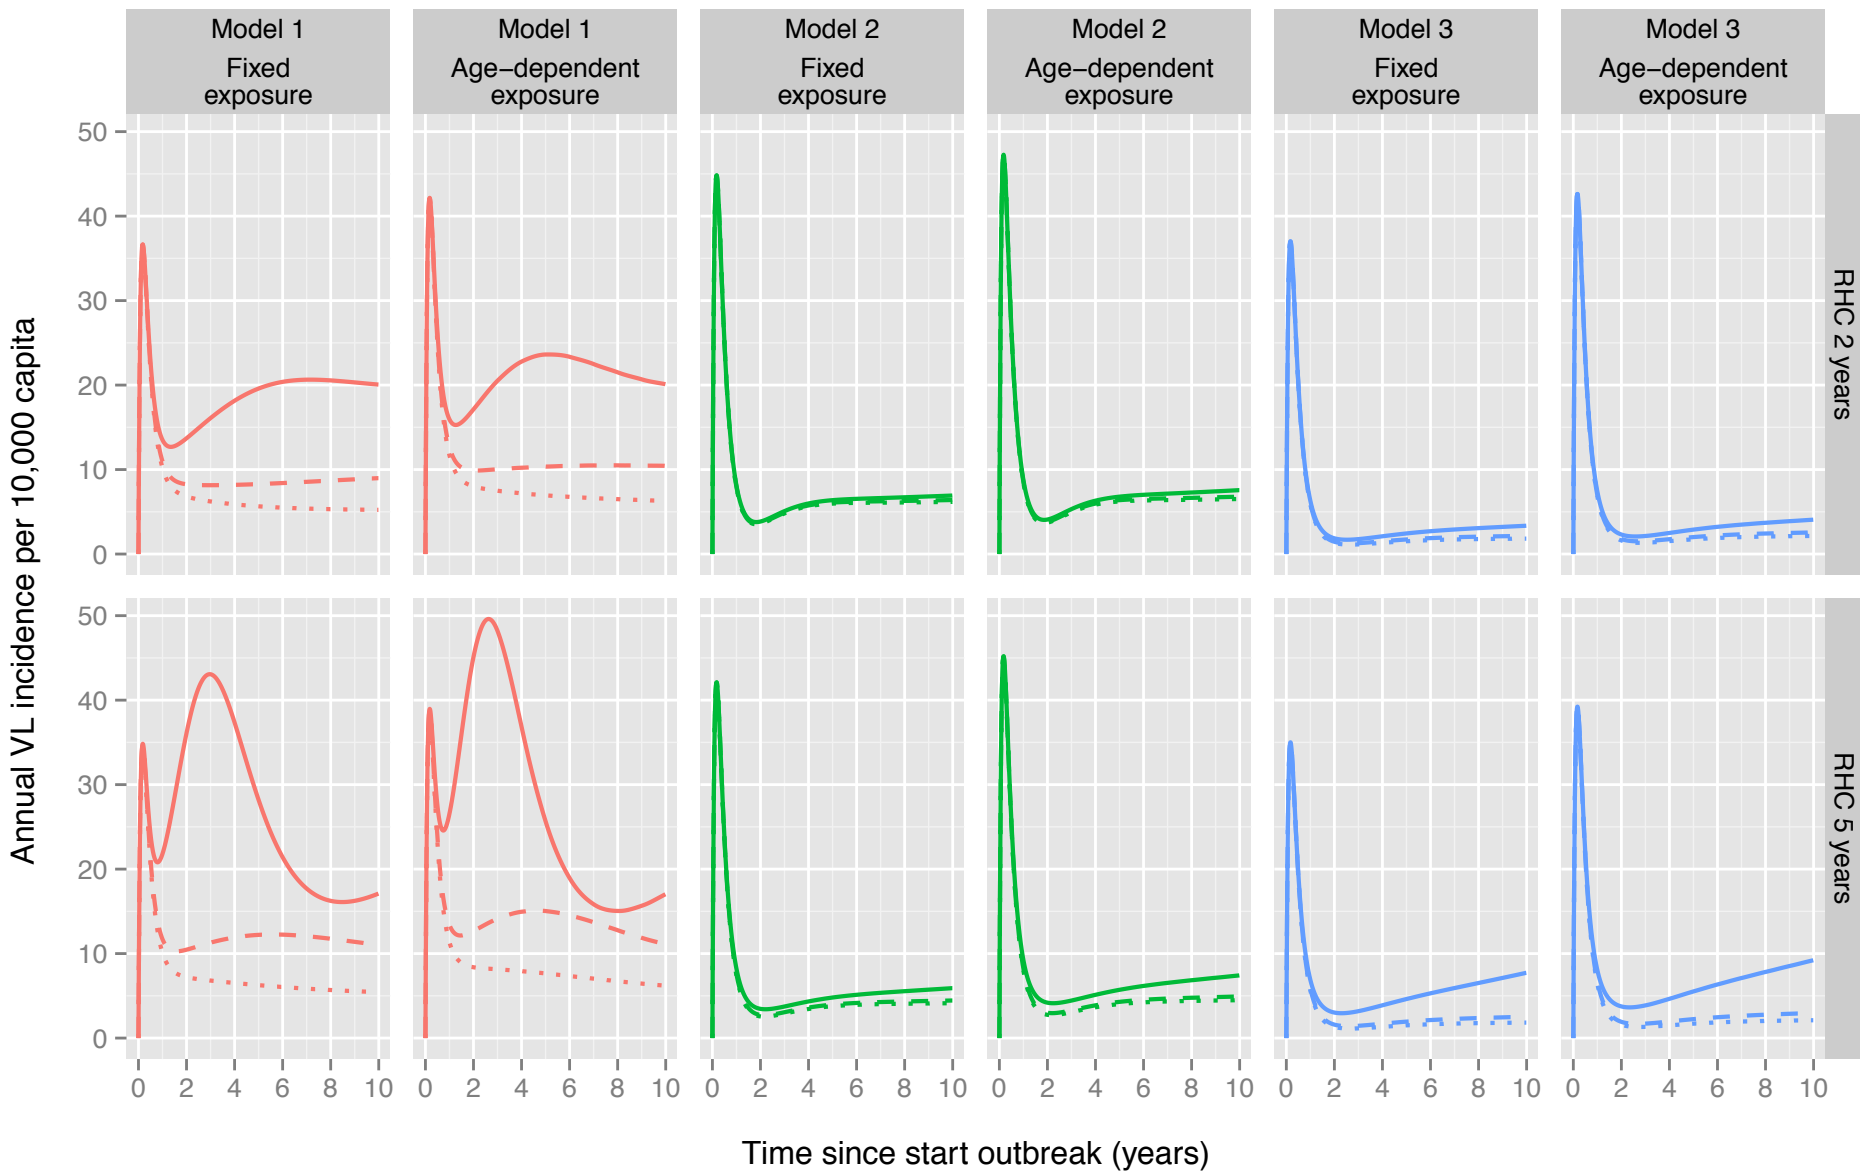

Supplement: 13071_2016_1292_MOESM3_ESM.pdf [file 13071_2016_1292_MOESM3_ESM.pdf]
