# Supplementary material for: Feasibility of eliminating visceral leishmaniasis from the Indian subcontinent: explorations with a set of deterministic age-structured transmission models
Source: PubMed Central journal article supplement (PMC4717541; doi:10.1186/s13071-016-1292-0), 2016-01-19

# Model 1

Sensitivity analysis — high (5/4) — low (4/5)

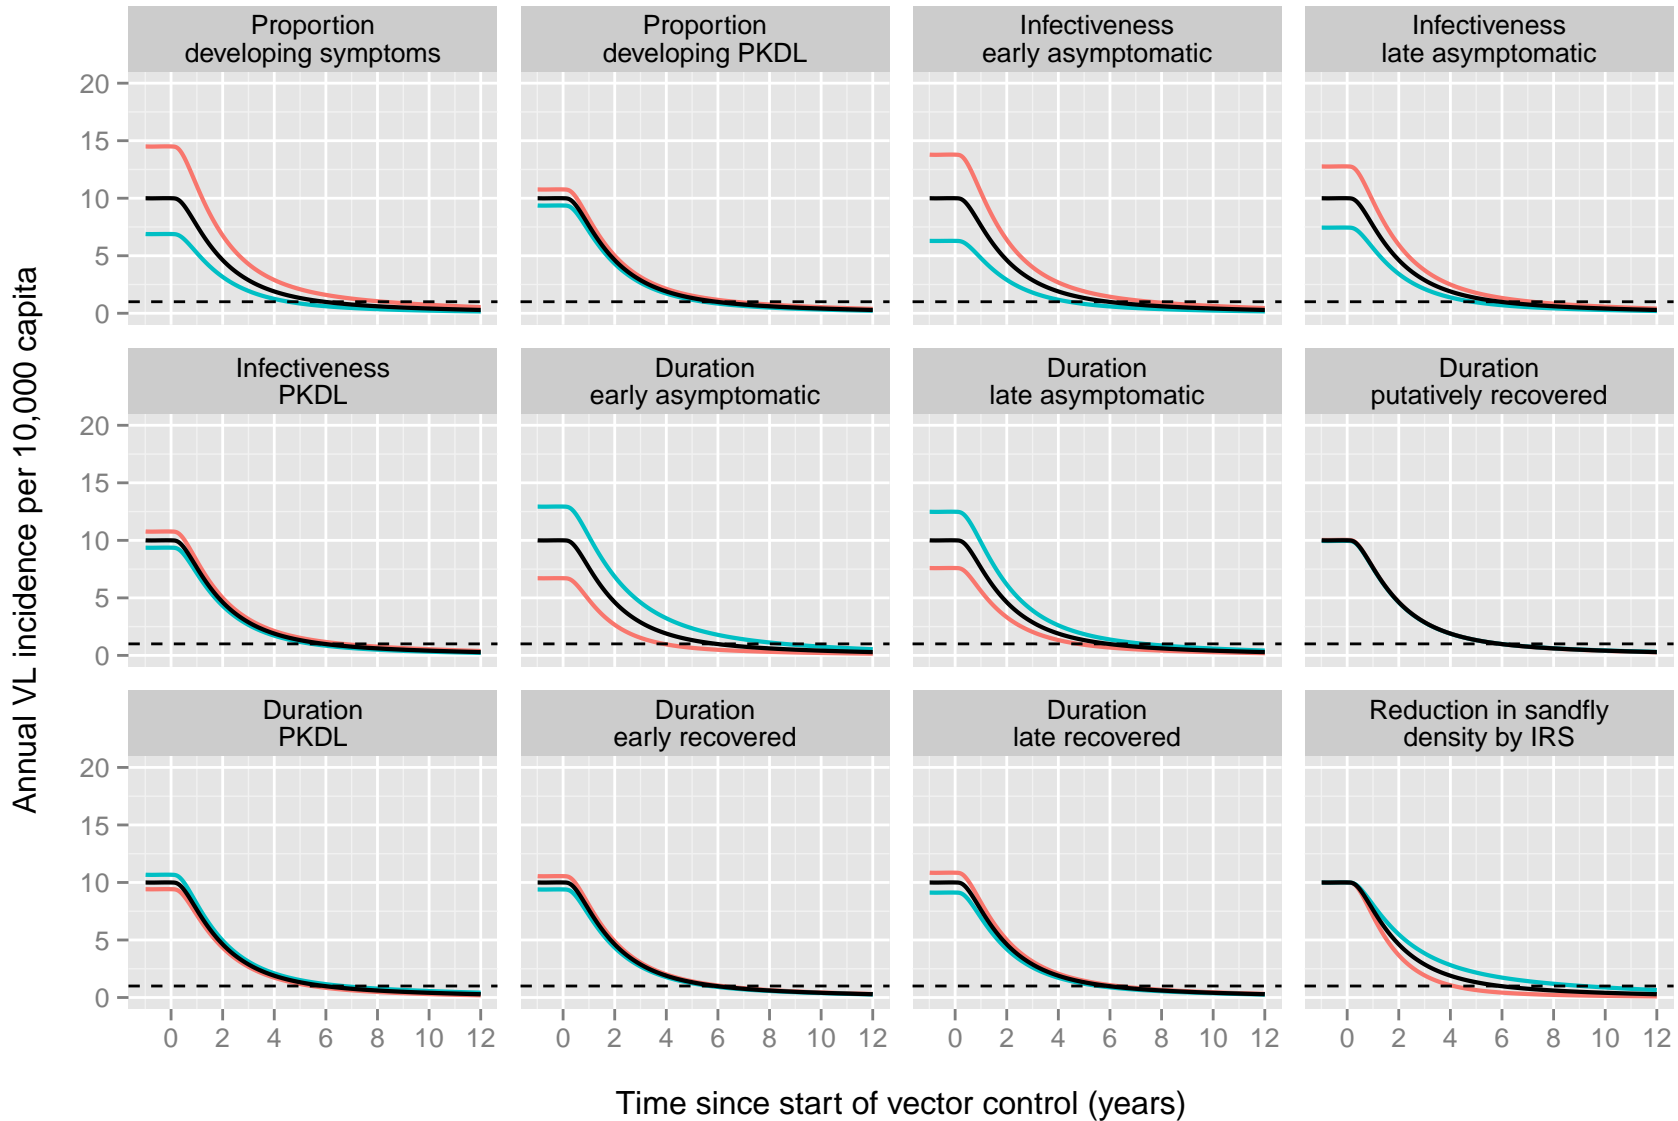

# Model 2

Sensitivity analysis — high (5/4) — low (4/5)

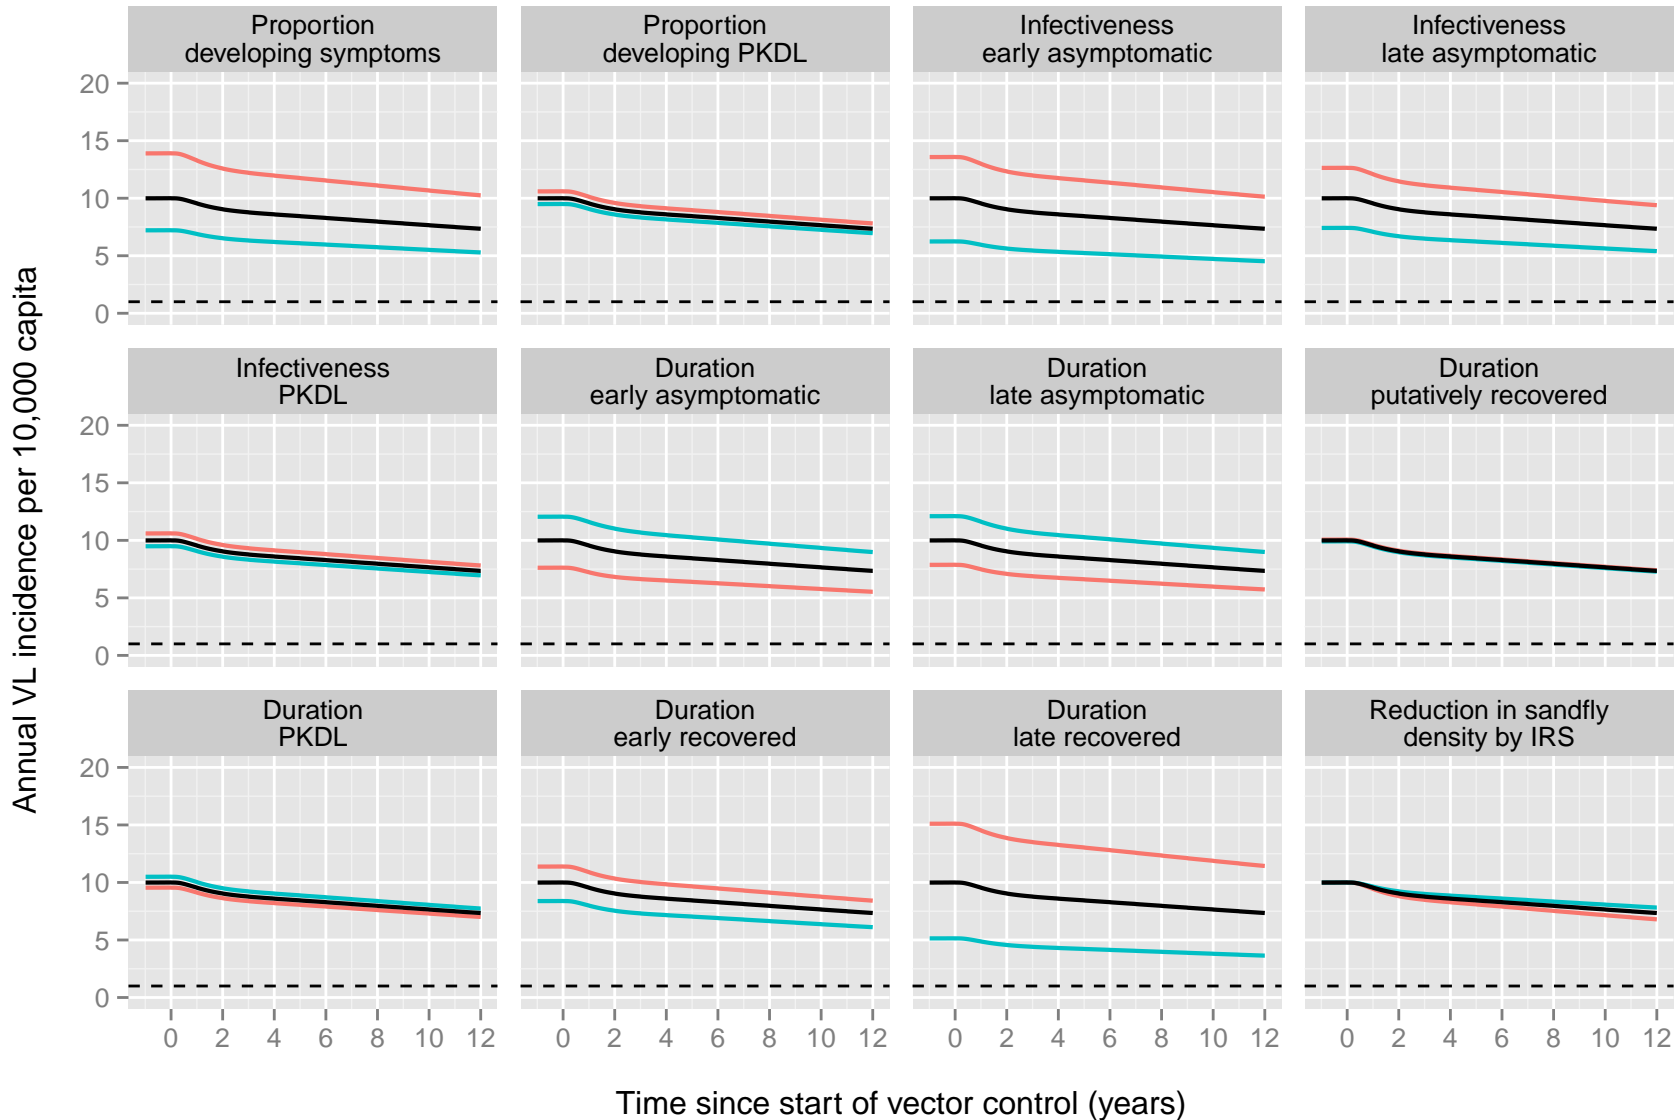

# Model 3

Sensitivity analysis — high (5/4) — low (4/5)

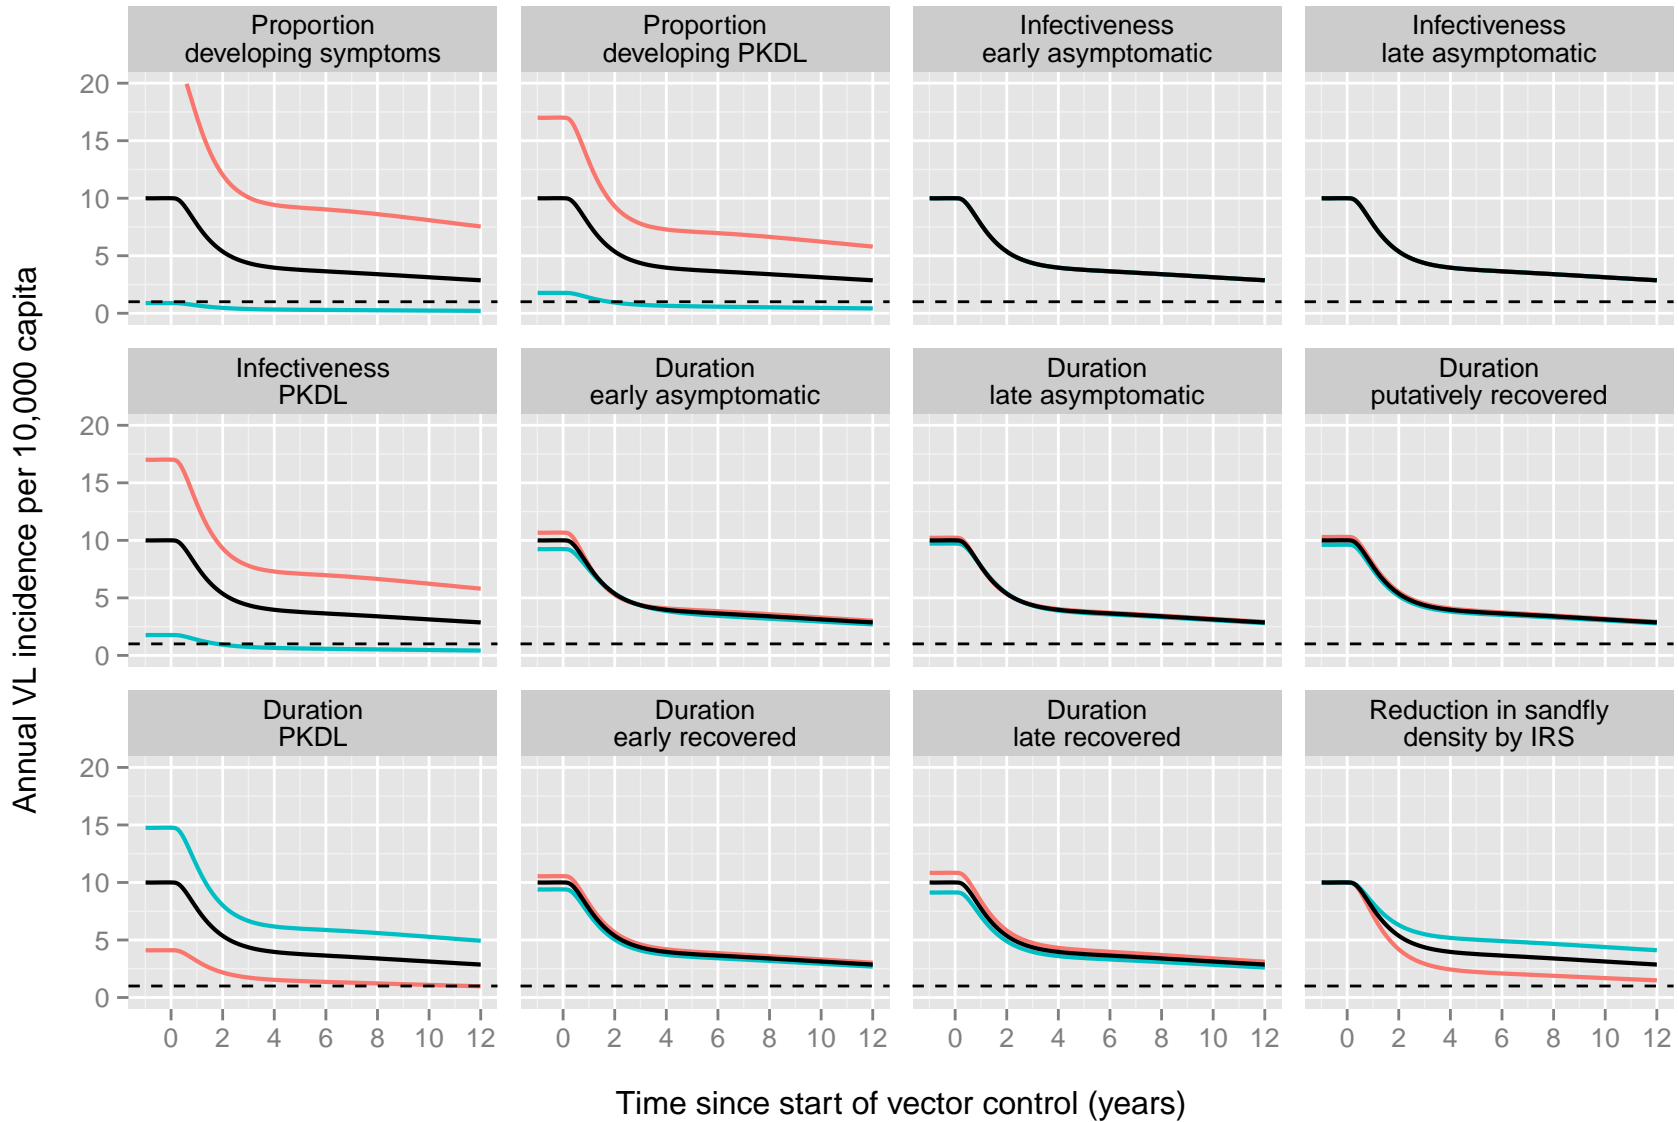

# Model 1 (zoom in on area around elimination target)

**Sensitivity analysis** — high (5/4) — low (4/5)

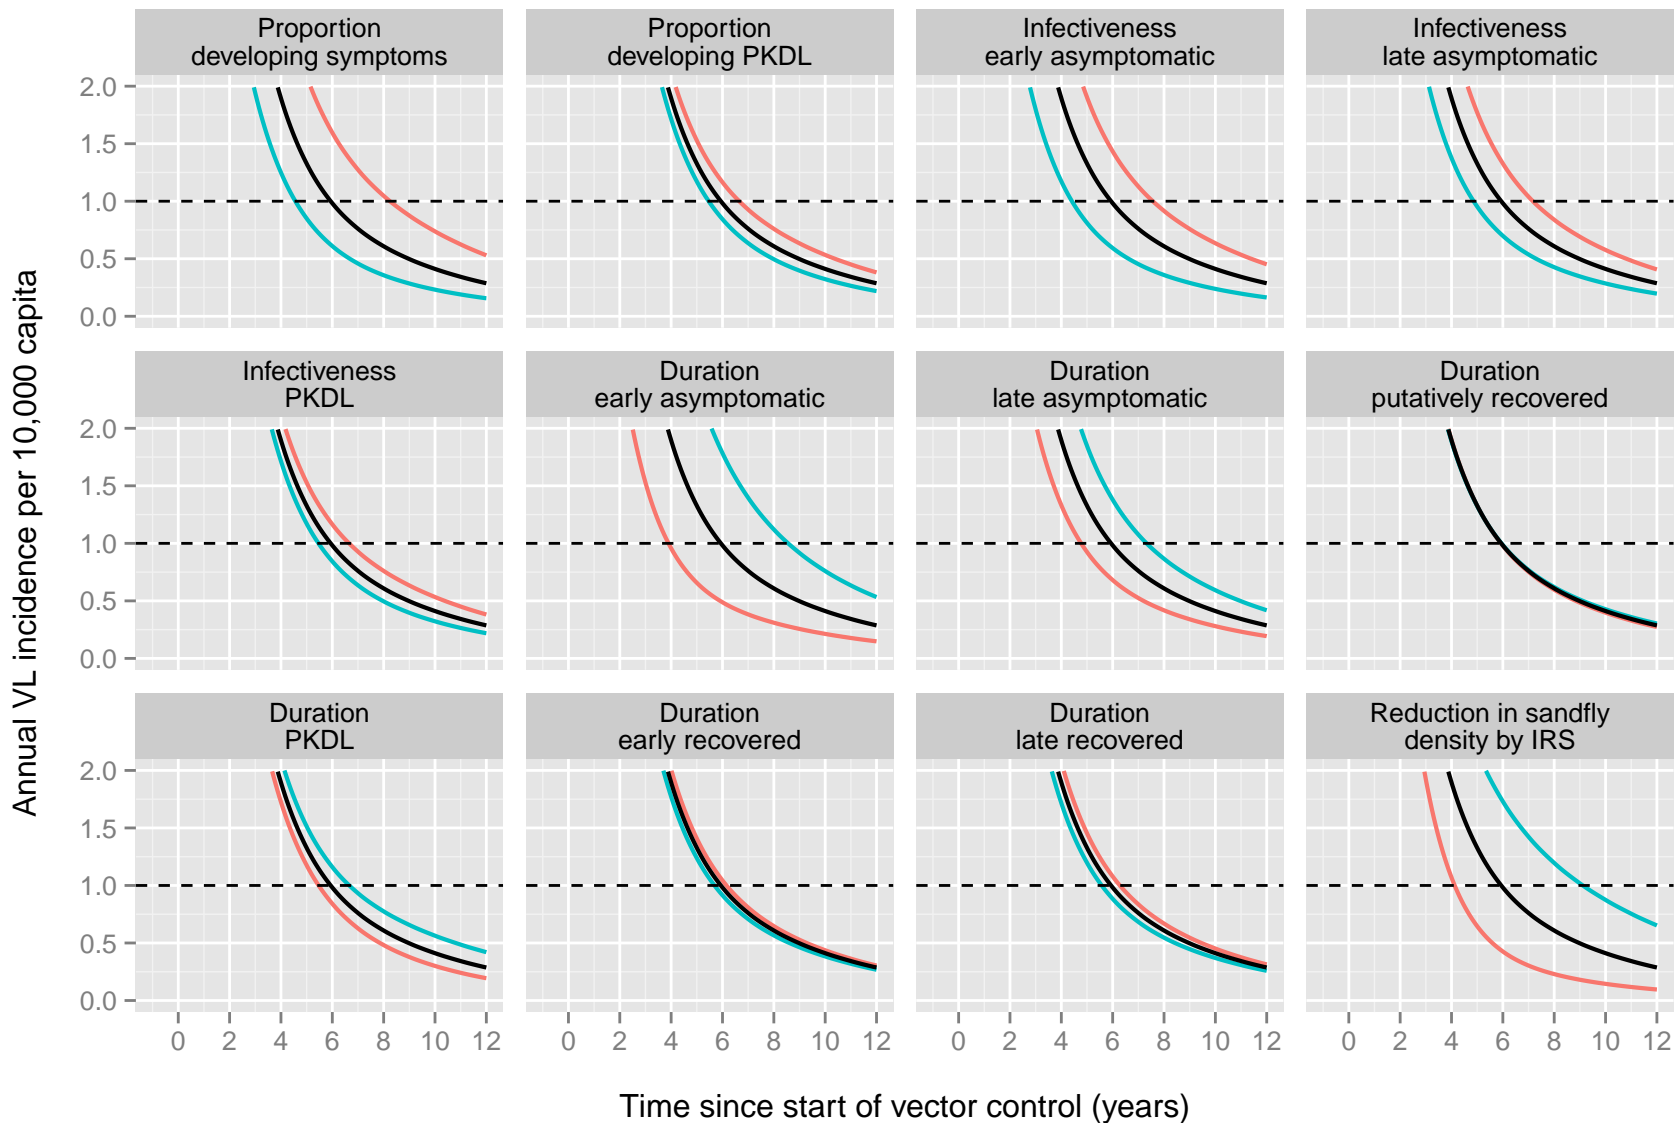

Supplement: 13071_2016_1292_MOESM5_ESM.pdf [file 13071_2016_1292_MOESM5_ESM.pdf]
